# Supplementary material
Source: publisher figshare collection journal article supplement (https://acs.figshare.com/ndownloader/files/4149862)
Supplement: Supplementary file 1 [file 4149862]

#-----------------------------------------------------------------------------80
#     Subsequently are contained the CIF's of three structures
#     1 = compound (2)
#     2 = compound (3)
#     3 = compound (4)
#     separated by #===END
#-----------------------------------------------------------------------------80

data_global

_publ_contact_author
;
  Dr. Enrique O\~nate Rodr\'iguez
  Departamento de Qu\'imica Inorg\'anica - I.C.M.A.
  Facultad de Ciencias
  Universidad de Zaragoza - C.S.I.C.
  50009 Zaragoza, Spain
;
_publ_contact_author_email        enriqueo@posta.unizar.es

#-----------------------------------------------------------------------------80
#Publication details

loop_
_publ_author_name
                     'Esteruelas, M. A.'
                     'Fern\'andez, I.'
                     'L\'opez, A. M.'
                     'Mora, M.'
                     'O\~nate, E.'

 _publ_requested_journal		'Organometallics'
 _journal_name_full
; 
  Organometallics
;
_publ_section_title
;
Preparation, Structure, Bond, and Preliminary Reactivity 
of a Six- Coordinate d4 Osmium-Boryl Complex
;
_publ_contact_letter              
;

May ##, 2012
Please consider this CIF submission as supplementary material of
the structures contained in the paper: 

Preparation, Structure, Bond, and Preliminary Reactivity 
of a Six- Coordinate d4 Osmium-Boryl Complex 

that is submitted to Organometallics for publication. 
;
_journal_volume      ?
_journal_page_first  ?
_journal_page_last   ?
_journal_year        ?      
                     


#-----------------------------------------------------------------------------80
# Data for compound 2 (local labelling enrique437) 
  
data_mae437as 
 
_audit_creation_method            SHELXL-97 
_chemical_name_systematic 
; 
 ? 
; 
_chemical_name_common             ? 
_chemical_melting_point           ? 
_chemical_formula_moiety          ? 
_chemical_formula_sum 
 'C30 H51 B2 Cl O4 Os P2' 
_chemical_formula_weight          784.92 
 
loop_ 
 _atom_type_symbol 
 _atom_type_description 
 _atom_type_scat_dispersion_real 
 _atom_type_scat_dispersion_imag 
 _atom_type_scat_source 
 'C'  'C'   0.0033   0.0016 
 'International Tables Vol C Tables 4.2.6.8 and 6.1.1.4' 
 'H'  'H'   0.0000   0.0000 
 'International Tables Vol C Tables 4.2.6.8 and 6.1.1.4' 
 'B'  'B'   0.0013   0.0007 
 'International Tables Vol C Tables 4.2.6.8 and 6.1.1.4' 
 'O'  'O'   0.0106   0.0060 
 'International Tables Vol C Tables 4.2.6.8 and 6.1.1.4' 
 'P'  'P'   0.1023   0.0942 
 'International Tables Vol C Tables 4.2.6.8 and 6.1.1.4' 
 'Cl'  'Cl'   0.1484   0.1585 
 'International Tables Vol C Tables 4.2.6.8 and 6.1.1.4' 
 'Os'  'Os'  -1.2165   7.6030 
 'International Tables Vol C Tables 4.2.6.8 and 6.1.1.4' 
 
_symmetry_cell_setting            'orthorhombic' 
_symmetry_space_group_name_H-M    'P212121'
 
loop_ 
 _symmetry_equiv_pos_as_xyz 
 'x, y, z' 
 '-x+1/2, -y, z+1/2' 
 '-x, y+1/2, -z+1/2' 
 'x+1/2, -y+1/2, -z' 
 
_cell_length_a                    15.523(3) 
_cell_length_b                    19.470(4) 
_cell_length_c                    22.098(5) 
_cell_angle_alpha                 90.00 
_cell_angle_beta                  90.00 
_cell_angle_gamma                 90.00 
_cell_volume                      6678(2) 
_cell_formula_units_Z             8 
_cell_measurement_temperature     100(2) 
_cell_measurement_reflns_used     5591 
_cell_measurement_theta_min       2 
_cell_measurement_theta_max       27 
 
_exptl_crystal_description        'irregular block' 
_exptl_crystal_colour             'yellow' 
_exptl_crystal_size_max           0.12 
_exptl_crystal_size_mid           0.06 
_exptl_crystal_size_min           0.06 
_exptl_crystal_density_meas       ? 
_exptl_crystal_density_diffrn     1.561 
_exptl_crystal_density_method     'not measured' 
_exptl_crystal_F_000              3168 
_exptl_absorpt_coefficient_mu     4.027 
_exptl_absorpt_correction_type    'multi-scan' 
_exptl_absorpt_correction_T_min   0.588 
_exptl_absorpt_correction_T_max   0.794 
_exptl_absorpt_process_details    
;
Absorption correction performed with SADABS program. This is based on the
method of Blessing: Blessing, R. H., Acta Crystallogr., Sect. A 1995, 51, 33.

SADABS: Area-Detector Absorption Correction. Bruker-AXS 
within SAINT+ package, v. 6.1 (2000).
; 
 
_diffrn_ambient_temperature       100(2) 
_diffrn_radiation_wavelength      0.71073 
_diffrn_radiation_type            MoK\a 
_diffrn_radiation_source          'normal-focus sealed tube' 
_diffrn_radiation_monochromator   graphite 
_diffrn_measurement_device_type   'Bruker SMART APEX CCD system' 
_diffrn_measurement_method        '\w rotations with narrow frames' 
_diffrn_detector_area_resol_mean  8.26 
_diffrn_standards_decay_%         '0' 
_diffrn_reflns_number             83408 
_diffrn_reflns_av_R_equivalents   0.0682 
_diffrn_reflns_av_sigmaI/netI     0.0556 
_diffrn_reflns_limit_h_min        -20 
_diffrn_reflns_limit_h_max        20 
_diffrn_reflns_limit_k_min        -25 
_diffrn_reflns_limit_k_max        26 
_diffrn_reflns_limit_l_min        -29 
_diffrn_reflns_limit_l_max        29 
_diffrn_reflns_theta_min          1.39 
_diffrn_reflns_theta_max          28.79 
_reflns_number_total              16441 
_reflns_number_gt                 14918 
_reflns_threshold_expression      >2sigma(I) 
 
_computing_data_collection        'SMART v. 5.625 (Bruker AXS, 2000)' 
_computing_cell_refinement        'SAINT+ v. 6.1 (Bruker AXS, 2000)' 
_computing_data_reduction         'SAINT+ v. 6.1 (Bruker AXS, 2000)' 
_computing_structure_solution     'SHELXS-97 (Sheldrick, 1990)' 
_computing_structure_refinement   'SHELXL-97 (Sheldrick, 1997)' 
_computing_molecular_graphics     'XP, SHELXTL v. 6.1 (Bruker, 2000)' 
_computing_publication_material   'XCIF, SHELXTL v. 6.1 (Bruker, 2000)'
 
_refine_special_details 
; 
 Refinement of F^2^ against ALL reflections.  The weighted R-factor wR and 
 goodness of fit S are based on F^2^, conventional R-factors R are based 
 on F, with F set to zero for negative F^2^. The threshold expression of 
 F^2^ > 2sigma(F^2^) is used only for calculating R-factors(gt) etc. and is 
 not relevant to the choice of reflections for refinement.  R-factors based 
 on F^2^ are statistically about twice as large as those based on F, and R- 
 factors based on ALL data will be even larger. 
; 
 
_refine_ls_structure_factor_coef  Fsqd  
_refine_ls_matrix_type            full 
_refine_ls_weighting_scheme       calc  
_refine_ls_weighting_details 
 'calc w=1/[\s^2^(Fo^2^)+(0.0204P)^2^+8.1886P] where P=(Fo^2^+2Fc^2^)/3' 
_atom_sites_solution_primary      direct 
_atom_sites_solution_secondary    difmap 
_atom_sites_solution_hydrogens    geom 
_refine_ls_hydrogen_treatment     mixed 
_refine_ls_extinction_method      none 
_refine_ls_extinction_coef        ? 
_refine_ls_abs_structure_details 
 'Flack H D (1983), Acta Cryst. A39, 876-881' 
_refine_ls_abs_structure_Flack    0.007(6) 
_refine_ls_number_reflns          16441 
_refine_ls_number_parameters      752 
_refine_ls_number_restraints      2 
_refine_ls_R_factor_all           0.0527 
_refine_ls_R_factor_gt            0.0451 
_refine_ls_wR_factor_ref          0.0756 
_refine_ls_wR_factor_gt           0.0735 
_refine_ls_goodness_of_fit_ref    1.146 
_refine_ls_restrained_S_all       1.146 
_refine_ls_shift/su_max           0.010 
_refine_ls_shift/su_mean          0.000 
 
loop_ 
 _atom_site_label 
 _atom_site_type_symbol 
 _atom_site_fract_x 
 _atom_site_fract_y 
 _atom_site_fract_z 
 _atom_site_U_iso_or_equiv 
 _atom_site_adp_type 
 _atom_site_occupancy 
 _atom_site_symmetry_multiplicity 
 _atom_site_calc_flag 
 _atom_site_refinement_flags 
 _atom_site_disorder_assembly 
 _atom_site_disorder_group 
Os1 Os 0.096171(12) 0.177224(12) 0.382050(9) 0.01383(5) Uani 1 1 d D . . 
H01 H 0.1974(7) 0.173(3) 0.375(2) 0.017 Uiso 1 1 d D . . 
Os2 Os 0.883785(12) 0.826689(12) 0.623756(9) 0.01283(5) Uani 1 1 d D . . 
H02 H 0.7851(10) 0.819(3) 0.637(2) 0.015 Uiso 1 1 d D . . 
Cl1 Cl -0.05791(8) 0.18072(8) 0.38539(6) 0.0211(3) Uani 1 1 d . . . 
Cl2 Cl 1.03570(8) 0.83230(8) 0.60478(6) 0.0195(3) Uani 1 1 d . . . 
P1 P 0.08147(11) 0.08771(9) 0.30733(7) 0.0193(3) Uani 1 1 d . . . 
P2 P 0.09575(11) 0.26525(9) 0.45777(7) 0.0160(3) Uani 1 1 d . . . 
P3 P 0.87292(11) 0.74110(8) 0.54599(7) 0.0151(3) Uani 1 1 d . . . 
P4 P 0.90306(10) 0.91350(8) 0.69912(7) 0.0147(3) Uani 1 1 d . . . 
O1 O 0.1262(3) 0.2784(2) 0.28341(19) 0.0218(10) Uani 1 1 d . . . 
O2 O 0.2590(3) 0.2511(2) 0.3216(2) 0.0227(10) Uani 1 1 d . . . 
O3 O 0.1281(3) 0.0608(2) 0.46651(19) 0.0219(10) Uani 1 1 d . . . 
O4 O 0.2582(3) 0.1137(2) 0.4502(2) 0.0233(10) Uani 1 1 d . . . 
O5 O 0.8218(3) 0.9284(2) 0.53382(18) 0.0187(9) Uani 1 1 d . . . 
O6 O 0.7014(3) 0.8870(2) 0.58222(19) 0.0188(9) Uani 1 1 d . . . 
O7 O 0.8948(3) 0.7179(2) 0.71813(18) 0.0184(9) Uani 1 1 d . . . 
O8 O 0.7510(3) 0.7433(2) 0.70621(18) 0.0167(9) Uani 1 1 d . . . 
B1 B 0.1694(5) 0.2376(4) 0.3274(3) 0.0191(15) Uani 1 1 d . . . 
B2 B 0.1693(5) 0.1158(4) 0.4352(3) 0.0156(14) Uani 1 1 d . . . 
B3 B 0.8339(5) 0.7601(4) 0.6860(3) 0.0189(15) Uani 1 1 d . . . 
B4 B 0.7927(4) 0.8821(4) 0.5805(3) 0.0146(14) Uani 1 1 d . . . 
C1 C 0.1886(5) 0.3131(4) 0.2514(3) 0.0265(16) Uani 1 1 d . . . 
C2 C 0.1770(6) 0.3584(4) 0.2039(3) 0.040(2) Uani 1 1 d . . . 
H2 H 0.1215 0.3702 0.1892 0.047 Uiso 1 1 calc R . . 
C3 C 0.2516(6) 0.3855(4) 0.1792(3) 0.045(2) Uani 1 1 d . . . 
H3 H 0.2471 0.4160 0.1458 0.054 Uiso 1 1 calc R . . 
C4 C 0.3315(6) 0.3696(4) 0.2014(4) 0.047(2) Uani 1 1 d . . . 
H4 H 0.3808 0.3902 0.1834 0.057 Uiso 1 1 calc R . . 
C5 C 0.3431(5) 0.3239(4) 0.2499(3) 0.0386(17) Uani 1 1 d . . . 
H5 H 0.3984 0.3122 0.2651 0.046 Uiso 1 1 calc R . . 
C6 C 0.2677(5) 0.2971(3) 0.2741(3) 0.0278(17) Uani 1 1 d . . . 
C7 C 0.1906(5) 0.0265(3) 0.4988(3) 0.0250(15) Uani 1 1 d . . . 
C8 C 0.1827(5) -0.0309(3) 0.5347(3) 0.0316(17) Uani 1 1 d . . . 
H8 H 0.1293 -0.0543 0.5393 0.038 Uiso 1 1 calc R . . 
C9 C 0.2562(6) -0.0526(4) 0.5635(3) 0.039(2) Uani 1 1 d . . . 
H9 H 0.2532 -0.0913 0.5896 0.046 Uiso 1 1 calc R . . 
C10 C 0.3339(6) -0.0201(4) 0.5556(3) 0.045(2) Uani 1 1 d . . . 
H10 H 0.3830 -0.0369 0.5765 0.054 Uiso 1 1 calc R . . 
C11 C 0.3429(5) 0.0371(4) 0.5179(3) 0.0333(18) Uani 1 1 d . . . 
H11 H 0.3966 0.0595 0.5120 0.040 Uiso 1 1 calc R . . 
C12 C 0.2690(5) 0.0585(3) 0.4899(3) 0.0241(16) Uani 1 1 d . . . 
C13 C 0.1777(4) 0.0625(4) 0.2634(3) 0.0251(15) Uani 1 1 d . . . 
H13 H 0.1599 0.0243 0.2359 0.030 Uiso 1 1 calc R . . 
C14 C 0.2136(5) 0.1198(4) 0.2233(3) 0.0332(18) Uani 1 1 d . . . 
H14A H 0.2362 0.1568 0.2488 0.050 Uiso 1 1 calc R . . 
H14B H 0.1675 0.1378 0.1974 0.050 Uiso 1 1 calc R . . 
H14C H 0.2600 0.1015 0.1979 0.050 Uiso 1 1 calc R . . 
C15 C 0.2489(5) 0.0342(5) 0.3045(4) 0.045(2) Uani 1 1 d . . . 
H15A H 0.2990 0.0217 0.2799 0.067 Uiso 1 1 calc R . . 
H15B H 0.2276 -0.0065 0.3258 0.067 Uiso 1 1 calc R . . 
H15C H 0.2655 0.0693 0.3340 0.067 Uiso 1 1 calc R . . 
C16 C 0.0514(4) 0.0053(3) 0.3440(3) 0.0268(16) Uani 1 1 d . . . 
H16 H 0.0951 -0.0022 0.3766 0.032 Uiso 1 1 calc R . . 
C17 C -0.0360(4) 0.0068(3) 0.3764(4) 0.0361(17) Uani 1 1 d . . . 
H17A H -0.0817 0.0157 0.3468 0.054 Uiso 1 1 calc R . . 
H17B H -0.0358 0.0432 0.4070 0.054 Uiso 1 1 calc R . . 
H17C H -0.0462 -0.0376 0.3960 0.054 Uiso 1 1 calc R . . 
C18 C 0.0554(7) -0.0601(4) 0.3033(4) 0.064(3) Uani 1 1 d . . . 
H18A H 0.0511 -0.1012 0.3287 0.060 Uiso 1 1 calc R . . 
H18B H 0.1101 -0.0608 0.2812 0.060 Uiso 1 1 calc R . . 
H18C H 0.0074 -0.0594 0.2745 0.060 Uiso 1 1 calc R . . 
C19 C -0.0038(4) 0.1049(4) 0.2503(3) 0.0250(15) Uani 1 1 d . . . 
H19 H -0.0594 0.0932 0.2708 0.030 Uiso 1 1 calc R . . 
C20 C -0.0123(4) 0.1808(4) 0.2314(3) 0.0286(15) Uani 1 1 d . . . 
H20A H 0.0394 0.1949 0.2092 0.043 Uiso 1 1 calc R . . 
H20B H -0.0188 0.2094 0.2676 0.043 Uiso 1 1 calc R . . 
H20C H -0.0630 0.1863 0.2054 0.043 Uiso 1 1 calc R . . 
C21 C -0.0009(5) 0.0598(4) 0.1932(4) 0.045(2) Uani 1 1 d . . . 
H21A H -0.0499 0.0710 0.1671 0.068 Uiso 1 1 calc R . . 
H21B H -0.0037 0.0113 0.2048 0.068 Uiso 1 1 calc R . . 
H21C H 0.0530 0.0684 0.1713 0.068 Uiso 1 1 calc R . . 
C22 C 0.0073(4) 0.2519(3) 0.5133(3) 0.0174(13) Uani 1 1 d . . . 
H22 H -0.0474 0.2573 0.4899 0.021 Uiso 1 1 calc R . . 
C23 C 0.0048(4) 0.1779(4) 0.5396(3) 0.0252(14) Uani 1 1 d . . . 
H23A H 0.0588 0.1684 0.5609 0.038 Uiso 1 1 calc R . . 
H23B H -0.0026 0.1449 0.5065 0.038 Uiso 1 1 calc R . . 
H23C H -0.0436 0.1738 0.5679 0.038 Uiso 1 1 calc R . . 
C24 C 0.0018(4) 0.3048(3) 0.5657(3) 0.0235(15) Uani 1 1 d . . . 
H24A H -0.0524 0.2984 0.5877 0.035 Uiso 1 1 calc R . . 
H24B H 0.0040 0.3514 0.5491 0.035 Uiso 1 1 calc R . . 
H24C H 0.0503 0.2980 0.5934 0.035 Uiso 1 1 calc R . . 
C25 C 0.0654(4) 0.3522(3) 0.4299(3) 0.0177(13) Uani 1 1 d . . . 
H25 H 0.0473 0.3790 0.4663 0.021 Uiso 1 1 calc R . . 
C26 C -0.0122(4) 0.3514(3) 0.3875(3) 0.0234(14) Uani 1 1 d . . . 
H26A H -0.0297 0.3986 0.3785 0.035 Uiso 1 1 calc R . . 
H26B H -0.0600 0.3270 0.4070 0.035 Uiso 1 1 calc R . . 
H26C H 0.0032 0.3278 0.3498 0.035 Uiso 1 1 calc R . . 
C27 C 0.1400(4) 0.3938(3) 0.4001(3) 0.0250(15) Uani 1 1 d . . . 
H27A H 0.1706 0.3645 0.3712 0.037 Uiso 1 1 calc R . . 
H27B H 0.1800 0.4093 0.4316 0.037 Uiso 1 1 calc R . . 
H27C H 0.1161 0.4337 0.3790 0.037 Uiso 1 1 calc R . . 
C28 C 0.1933(4) 0.2846(3) 0.5037(3) 0.0198(14) Uani 1 1 d . . . 
H28 H 0.1847 0.3316 0.5211 0.024 Uiso 1 1 calc R . . 
C29 C 0.2086(4) 0.2358(4) 0.5576(3) 0.0235(14) Uani 1 1 d . . . 
H29A H 0.2098 0.1883 0.5431 0.035 Uiso 1 1 calc R . . 
H29B H 0.1619 0.2413 0.5871 0.035 Uiso 1 1 calc R . . 
H29C H 0.2637 0.2469 0.5768 0.035 Uiso 1 1 calc R . . 
C30 C 0.2754(4) 0.2874(4) 0.4663(3) 0.0224(15) Uani 1 1 d . . . 
H30A H 0.3214 0.3088 0.4902 0.034 Uiso 1 1 calc R . . 
H30B H 0.2653 0.3146 0.4297 0.034 Uiso 1 1 calc R . . 
H30C H 0.2926 0.2407 0.4550 0.034 Uiso 1 1 calc R . . 
C31 C 0.7494(4) 0.9580(3) 0.5086(3) 0.0195(14) Uani 1 1 d . . . 
C32 C 0.7442(4) 1.0045(3) 0.4616(3) 0.0228(14) Uani 1 1 d . . . 
H32 H 0.7940 1.0227 0.4422 0.027 Uiso 1 1 calc R . . 
C33 C 0.6607(5) 1.0231(4) 0.4443(3) 0.0283(16) Uani 1 1 d . . . 
H33 H 0.6537 1.0550 0.4122 0.034 Uiso 1 1 calc R . . 
C34 C 0.5883(5) 0.9971(3) 0.4720(3) 0.0276(15) Uani 1 1 d . . . 
H34 H 0.5330 1.0112 0.4584 0.033 Uiso 1 1 calc R . . 
C35 C 0.5947(4) 0.9499(3) 0.5202(3) 0.0233(14) Uani 1 1 d . . . 
H35 H 0.5453 0.9318 0.5400 0.028 Uiso 1 1 calc R . . 
C36 C 0.6770(4) 0.9318(3) 0.5369(3) 0.0185(13) Uani 1 1 d . . . 
C37 C 0.8478(4) 0.6779(4) 0.7570(3) 0.0205(12) Uani 1 1 d . . . 
C38 C 0.8760(4) 0.6297(3) 0.7975(3) 0.0222(14) Uani 1 1 d . . . 
H38 H 0.9355 0.6193 0.8018 0.027 Uiso 1 1 calc R . . 
C39 C 0.8138(5) 0.5966(3) 0.8321(3) 0.0259(15) Uani 1 1 d . . . 
H39 H 0.8311 0.5622 0.8600 0.031 Uiso 1 1 calc R . . 
C40 C 0.7286(4) 0.6123(4) 0.8269(3) 0.0253(15) Uani 1 1 d . . . 
H40 H 0.6879 0.5890 0.8516 0.030 Uiso 1 1 calc R . . 
C41 C 0.6995(4) 0.6625(3) 0.7856(3) 0.0203(13) Uani 1 1 d . . . 
H41 H 0.6403 0.6741 0.7821 0.024 Uiso 1 1 calc R . . 
C42 C 0.7618(4) 0.6937(3) 0.7505(2) 0.0154(13) Uani 1 1 d . . . 
C43 C 0.7671(4) 0.7217(3) 0.5119(3) 0.0182(13) Uani 1 1 d . . . 
H43 H 0.7728 0.6756 0.4924 0.022 Uiso 1 1 calc R . . 
C44 C 0.7383(4) 0.7713(3) 0.4617(3) 0.0252(15) Uani 1 1 d . . . 
H44A H 0.6830 0.7560 0.4451 0.038 Uiso 1 1 calc R . . 
H44B H 0.7816 0.7720 0.4295 0.038 Uiso 1 1 calc R . . 
H44C H 0.7319 0.8176 0.4786 0.038 Uiso 1 1 calc R . . 
C45 C 0.6936(4) 0.7154(3) 0.5584(3) 0.0258(15) Uani 1 1 d . . . 
H45A H 0.6773 0.7612 0.5727 0.039 Uiso 1 1 calc R . . 
H45B H 0.7131 0.6876 0.5928 0.039 Uiso 1 1 calc R . . 
H45C H 0.6438 0.6933 0.5394 0.039 Uiso 1 1 calc R . . 
C46 C 0.9477(4) 0.7581(3) 0.4813(3) 0.0176(13) Uani 1 1 d . . . 
H46 H 1.0068 0.7510 0.4983 0.021 Uiso 1 1 calc R . . 
C47 C 0.9415(5) 0.7080(4) 0.4281(3) 0.0296(16) Uani 1 1 d . . . 
H47A H 0.8902 0.7186 0.4041 0.044 Uiso 1 1 calc R . . 
H47B H 0.9375 0.6609 0.4435 0.044 Uiso 1 1 calc R . . 
H47C H 0.9930 0.7125 0.4027 0.044 Uiso 1 1 calc R . . 
C48 C 0.9473(4) 0.8326(3) 0.4587(3) 0.0247(14) Uani 1 1 d . . . 
H48A H 0.9940 0.8391 0.4295 0.037 Uiso 1 1 calc R . . 
H48B H 0.9555 0.8638 0.4930 0.037 Uiso 1 1 calc R . . 
H48C H 0.8920 0.8425 0.4392 0.037 Uiso 1 1 calc R . . 
C49 C 0.9109(4) 0.6529(3) 0.5670(3) 0.0192(13) Uani 1 1 d . . . 
H49 H 0.9223 0.6290 0.5278 0.023 Uiso 1 1 calc R . . 
C50 C 0.9968(4) 0.6553(3) 0.5994(3) 0.0235(15) Uani 1 1 d . . . 
H50A H 0.9910 0.6817 0.6369 0.035 Uiso 1 1 calc R . . 
H50B H 1.0398 0.6772 0.5732 0.035 Uiso 1 1 calc R . . 
H50C H 1.0154 0.6084 0.6090 0.035 Uiso 1 1 calc R . . 
C51 C 0.8472(4) 0.6080(3) 0.6001(3) 0.0249(15) Uani 1 1 d . . . 
H51A H 0.8730 0.5628 0.6075 0.037 Uiso 1 1 calc R . . 
H51B H 0.7951 0.6026 0.5754 0.037 Uiso 1 1 calc R . . 
H51C H 0.8321 0.6294 0.6388 0.037 Uiso 1 1 calc R . . 
C52 C 0.8162(4) 0.9235(4) 0.7561(3) 0.0210(14) Uani 1 1 d . . . 
H52 H 0.8257 0.9687 0.7766 0.025 Uiso 1 1 calc R . . 
C53 C 0.8172(4) 0.8678(3) 0.8058(3) 0.0250(15) Uani 1 1 d . . . 
H53A H 0.7680 0.8746 0.8330 0.037 Uiso 1 1 calc R . . 
H53B H 0.8709 0.8712 0.8290 0.037 Uiso 1 1 calc R . . 
H53C H 0.8133 0.8223 0.7870 0.037 Uiso 1 1 calc R . . 
C54 C 0.7269(4) 0.9252(4) 0.7295(3) 0.0297(16) Uani 1 1 d . . . 
H54A H 0.7112 0.8792 0.7153 0.045 Uiso 1 1 calc R . . 
H54B H 0.7255 0.9575 0.6955 0.045 Uiso 1 1 calc R . . 
H54C H 0.6858 0.9402 0.7606 0.045 Uiso 1 1 calc R . . 
C55 C 0.9168(4) 1.0032(3) 0.6687(3) 0.0229(14) Uani 1 1 d . . . 
H55 H 0.9423 1.0307 0.7025 0.027 Uiso 1 1 calc R . . 
C56 C 0.9827(4) 1.0047(3) 0.6179(3) 0.0265(14) Uani 1 1 d . . . 
H56A H 0.9598 0.9802 0.5827 0.040 Uiso 1 1 calc R . . 
H56B H 1.0359 0.9823 0.6315 0.040 Uiso 1 1 calc R . . 
H56C H 0.9950 1.0524 0.6069 0.040 Uiso 1 1 calc R . . 
C57 C 0.8350(4) 1.0399(3) 0.6509(3) 0.0299(16) Uani 1 1 d . . . 
H57A H 0.8493 1.0848 0.6336 0.045 Uiso 1 1 calc R . . 
H57B H 0.7987 1.0463 0.6868 0.045 Uiso 1 1 calc R . . 
H57C H 0.8039 1.0124 0.6209 0.045 Uiso 1 1 calc R . . 
C58 C 1.0043(4) 0.9073(3) 0.7446(3) 0.0173(13) Uani 1 1 d . . . 
H58 H 1.0514 0.9223 0.7166 0.021 Uiso 1 1 calc R . . 
C59 C 1.0280(4) 0.8347(3) 0.7634(3) 0.0245(14) Uani 1 1 d . . . 
H59A H 1.0849 0.8349 0.7827 0.037 Uiso 1 1 calc R . . 
H59B H 1.0295 0.8050 0.7276 0.037 Uiso 1 1 calc R . . 
H59C H 0.9851 0.8173 0.7921 0.037 Uiso 1 1 calc R . . 
C60 C 1.0088(4) 0.9571(4) 0.7985(3) 0.0261(15) Uani 1 1 d . . . 
H60A H 0.9627 0.9463 0.8273 0.039 Uiso 1 1 calc R . . 
H60B H 1.0018 1.0044 0.7840 0.039 Uiso 1 1 calc R . . 
H60C H 1.0648 0.9525 0.8186 0.039 Uiso 1 1 calc R . . 
 
loop_ 
 _atom_site_aniso_label 
 _atom_site_aniso_U_11 
 _atom_site_aniso_U_22 
 _atom_site_aniso_U_33 
 _atom_site_aniso_U_23 
 _atom_site_aniso_U_13 
 _atom_site_aniso_U_12 
Os1 0.01373(10) 0.01470(11) 0.01305(10) 0.00077(11) 0.00007(8) 0.00006(9) 
Os2 0.01421(10) 0.01229(10) 0.01198(9) 0.00060(10) 0.00055(8) 0.00050(9) 
Cl1 0.0162(6) 0.0248(7) 0.0224(7) -0.0051(7) -0.0004(5) -0.0008(6) 
Cl2 0.0154(6) 0.0218(8) 0.0214(7) -0.0035(6) 0.0019(5) -0.0010(6) 
P1 0.0170(8) 0.0217(9) 0.0192(8) -0.0037(7) 0.0024(6) -0.0001(7) 
P2 0.0163(8) 0.0165(8) 0.0152(7) 0.0004(6) -0.0014(6) -0.0033(7) 
P3 0.0172(8) 0.0131(8) 0.0149(7) -0.0005(6) -0.0007(6) 0.0009(6) 
P4 0.0134(8) 0.0148(8) 0.0158(7) -0.0005(6) -0.0002(6) 0.0013(6) 
O1 0.026(3) 0.026(3) 0.013(2) 0.0055(18) 0.0019(19) 0.000(2) 
O2 0.017(2) 0.024(3) 0.027(2) 0.0038(19) 0.0029(19) -0.0015(18) 
O3 0.025(3) 0.016(2) 0.025(2) 0.0092(18) 0.003(2) 0.0058(19) 
O4 0.025(3) 0.019(2) 0.026(2) 0.0004(19) -0.004(2) 0.002(2) 
O5 0.018(2) 0.022(2) 0.016(2) -0.0001(18) -0.0026(17) 0.0037(19) 
O6 0.018(2) 0.016(2) 0.023(2) 0.0012(18) -0.0008(18) 0.0003(17) 
O7 0.019(2) 0.019(2) 0.018(2) 0.0080(17) 0.0032(18) -0.0025(19) 
O8 0.020(2) 0.014(2) 0.016(2) 0.0023(17) 0.0001(18) 0.0026(17) 
B1 0.027(4) 0.017(4) 0.013(3) -0.003(3) 0.004(3) 0.002(3) 
B2 0.021(4) 0.014(3) 0.012(3) -0.002(3) 0.001(3) 0.002(3) 
B3 0.022(4) 0.018(4) 0.016(3) -0.004(3) -0.004(3) 0.000(3) 
B4 0.019(4) 0.013(3) 0.012(3) 0.000(3) 0.003(3) -0.004(3) 
C1 0.046(4) 0.010(4) 0.023(3) -0.001(3) 0.012(3) -0.003(3) 
C2 0.057(5) 0.037(5) 0.025(4) 0.007(3) 0.001(4) 0.001(4) 
C3 0.081(7) 0.028(5) 0.025(4) 0.004(3) 0.022(4) -0.007(4) 
C4 0.067(6) 0.021(4) 0.054(5) -0.002(4) 0.039(5) -0.015(4) 
C5 0.040(4) 0.023(4) 0.053(5) -0.011(4) 0.024(3) -0.003(4) 
C6 0.040(5) 0.013(3) 0.029(4) -0.004(3) 0.020(3) -0.002(3) 
C7 0.043(4) 0.015(3) 0.017(3) -0.001(3) 0.000(3) 0.009(3) 
C8 0.058(5) 0.018(3) 0.019(3) 0.001(3) 0.002(3) 0.008(3) 
C9 0.076(6) 0.025(4) 0.015(3) -0.001(3) 0.001(4) 0.028(4) 
C10 0.075(7) 0.038(5) 0.023(4) -0.009(4) -0.022(4) 0.037(5) 
C11 0.039(4) 0.037(4) 0.024(4) -0.009(3) -0.012(3) 0.016(3) 
C12 0.039(4) 0.018(4) 0.015(3) -0.001(3) -0.007(3) 0.010(3) 
C13 0.021(4) 0.034(4) 0.019(3) -0.010(3) 0.002(3) 0.005(3) 
C14 0.024(4) 0.050(5) 0.026(4) -0.015(3) 0.011(3) -0.006(3) 
C15 0.025(4) 0.066(6) 0.043(5) -0.014(4) -0.001(4) 0.018(4) 
C16 0.029(4) 0.019(3) 0.032(4) 0.003(3) 0.008(3) 0.002(3) 
C17 0.044(4) 0.026(4) 0.038(4) 0.004(4) 0.012(4) -0.005(3) 
C18 0.115(9) 0.016(4) 0.062(6) -0.017(4) 0.046(6) -0.021(5) 
C19 0.018(3) 0.039(4) 0.018(3) -0.013(3) 0.003(3) -0.004(3) 
C20 0.025(3) 0.036(4) 0.025(3) 0.013(3) -0.005(3) -0.001(3) 
C21 0.040(5) 0.058(6) 0.038(5) -0.020(4) -0.011(4) 0.002(4) 
C22 0.022(3) 0.017(3) 0.013(3) -0.003(2) -0.007(2) -0.003(3) 
C23 0.031(4) 0.023(3) 0.021(3) 0.007(3) 0.004(2) -0.001(3) 
C24 0.027(4) 0.026(4) 0.018(3) -0.005(3) -0.002(3) 0.003(3) 
C25 0.022(3) 0.006(3) 0.025(3) -0.002(2) 0.002(3) -0.001(2) 
C26 0.025(3) 0.018(3) 0.027(4) 0.007(3) 0.000(3) 0.008(2) 
C27 0.026(4) 0.020(3) 0.029(4) -0.001(3) 0.003(3) -0.003(3) 
C28 0.019(3) 0.022(4) 0.019(3) -0.001(3) -0.004(3) -0.004(3) 
C29 0.018(3) 0.031(4) 0.022(3) 0.002(3) -0.005(3) 0.000(3) 
C30 0.016(3) 0.023(4) 0.029(4) -0.002(3) -0.002(3) -0.003(3) 
C31 0.026(4) 0.014(3) 0.018(3) -0.005(3) -0.006(3) 0.006(3) 
C32 0.033(4) 0.019(3) 0.017(3) 0.003(3) 0.004(3) 0.005(3) 
C33 0.043(4) 0.020(4) 0.021(3) -0.001(3) -0.012(3) 0.011(3) 
C34 0.029(4) 0.024(4) 0.029(4) -0.003(3) -0.013(3) 0.013(3) 
C35 0.019(3) 0.020(3) 0.030(3) -0.007(3) -0.006(3) 0.006(3) 
C36 0.024(4) 0.016(3) 0.016(3) -0.006(2) -0.006(3) 0.000(3) 
C37 0.022(3) 0.023(3) 0.017(3) -0.006(3) 0.005(2) -0.004(3) 
C38 0.026(4) 0.021(3) 0.019(3) 0.006(2) -0.002(3) 0.000(3) 
C39 0.047(4) 0.017(3) 0.014(3) 0.006(2) 0.004(3) 0.001(3) 
C40 0.032(4) 0.023(4) 0.021(3) 0.002(3) 0.007(3) -0.005(3) 
C41 0.025(3) 0.016(3) 0.020(3) -0.005(3) 0.006(2) -0.001(3) 
C42 0.022(3) 0.015(3) 0.009(3) 0.004(2) 0.003(2) 0.000(2) 
C43 0.018(3) 0.016(3) 0.021(3) -0.006(3) -0.002(3) 0.001(3) 
C44 0.027(4) 0.023(4) 0.026(4) -0.005(3) -0.007(3) 0.005(3) 
C45 0.024(4) 0.021(4) 0.033(4) -0.002(3) -0.001(3) -0.005(3) 
C46 0.013(3) 0.022(3) 0.018(3) 0.000(3) 0.002(2) 0.003(2) 
C47 0.031(4) 0.034(4) 0.023(4) -0.002(3) 0.004(3) 0.004(3) 
C48 0.026(3) 0.025(4) 0.024(3) 0.010(3) 0.003(2) 0.000(3) 
C49 0.023(3) 0.020(3) 0.014(3) -0.002(2) 0.000(2) 0.002(2) 
C50 0.032(4) 0.018(3) 0.021(3) -0.002(2) 0.001(3) 0.008(3) 
C51 0.038(4) 0.014(3) 0.023(3) 0.000(3) -0.003(3) -0.004(3) 
C52 0.015(3) 0.028(4) 0.020(3) -0.006(3) 0.005(2) 0.003(3) 
C53 0.030(4) 0.031(4) 0.014(3) -0.001(3) 0.003(3) -0.009(3) 
C54 0.021(4) 0.033(4) 0.035(4) -0.012(3) 0.001(3) 0.003(3) 
C55 0.033(4) 0.012(3) 0.024(3) -0.003(2) -0.005(3) 0.003(3) 
C56 0.031(3) 0.018(3) 0.031(4) 0.005(3) 0.002(3) -0.005(3) 
C57 0.037(4) 0.022(4) 0.031(4) -0.002(3) -0.007(3) 0.007(3) 
C58 0.011(3) 0.024(4) 0.018(3) -0.003(3) 0.000(2) -0.001(3) 
C59 0.023(3) 0.027(4) 0.024(3) -0.001(3) -0.002(2) 0.004(3) 
C60 0.021(4) 0.029(4) 0.028(4) -0.004(3) -0.002(3) -0.002(3) 
 
_geom_special_details 
; 
 All esds (except the esd in the dihedral angle between two l.s. planes) 
 are estimated using the full covariance matrix.  The cell esds are taken 
 into account individually in the estimation of esds in distances, angles 
 and torsion angles; correlations between esds in cell parameters are only 
 used when they are defined by crystal symmetry.  An approximate (isotropic) 
 treatment of cell esds is used for estimating esds involving l.s. planes. 
; 
 
loop_ 
 _geom_bond_atom_site_label_1 
 _geom_bond_atom_site_label_2 
 _geom_bond_distance 
 _geom_bond_site_symmetry_2 
 _geom_bond_publ_flag 
Os1 B2 2.025(7) . ? 
Os1 B1 2.033(7) . ? 
Os1 Cl1 2.3940(14) . ? 
Os1 P2 2.3953(17) . ? 
Os1 P1 2.4115(17) . ? 
Os1 H01 1.580(10) . ? 
Os2 B4 2.019(7) . ? 
Os2 B3 2.043(8) . ? 
Os2 P4 2.3916(16) . ? 
Os2 Cl2 2.3976(14) . ? 
Os2 P3 2.3996(16) . ? 
Os2 H02 1.568(10) . ? 
P1 C13 1.848(7) . ? 
P1 C19 1.858(7) . ? 
P1 C16 1.858(7) . ? 
P2 C22 1.860(7) . ? 
P2 C28 1.861(6) . ? 
P2 C25 1.863(6) . ? 
P3 C43 1.846(6) . ? 
P3 C46 1.871(6) . ? 
P3 C49 1.874(6) . ? 
P4 C52 1.855(6) . ? 
P4 C58 1.870(6) . ? 
P4 C55 1.884(6) . ? 
O1 C1 1.377(8) . ? 
O1 B1 1.423(8) . ? 
O2 C6 1.388(8) . ? 
O2 B1 1.422(9) . ? 
O3 C7 1.377(8) . ? 
O3 B2 1.425(8) . ? 
O4 C12 1.397(8) . ? 
O4 B2 1.420(8) . ? 
O5 C31 1.381(7) . ? 
O5 B4 1.442(8) . ? 
O6 C36 1.381(7) . ? 
O6 B4 1.422(8) . ? 
O7 C37 1.370(7) . ? 
O7 B3 1.439(8) . ? 
O8 C42 1.385(7) . ? 
O8 B3 1.401(9) . ? 
C1 C6 1.363(10) . ? 
C1 C2 1.382(9) . ? 
C2 C3 1.383(11) . ? 
C2 H2 0.9500 . ? 
C3 C4 1.370(12) . ? 
C3 H3 0.9500 . ? 
C4 C5 1.406(11) . ? 
C4 H4 0.9500 . ? 
C5 C6 1.387(9) . ? 
C5 H5 0.9500 . ? 
C7 C8 1.377(9) . ? 
C7 C12 1.383(10) . ? 
C8 C9 1.373(10) . ? 
C8 H8 0.9500 . ? 
C9 C10 1.373(12) . ? 
C9 H9 0.9500 . ? 
C10 C11 1.398(11) . ? 
C10 H10 0.9500 . ? 
C11 C12 1.368(9) . ? 
C11 H11 0.9500 . ? 
C13 C14 1.529(10) . ? 
C13 C15 1.532(10) . ? 
C13 H13 1.0000 . ? 
C14 H14A 0.9800 . ? 
C14 H14B 0.9800 . ? 
C14 H14C 0.9800 . ? 
C15 H15A 0.9800 . ? 
C15 H15B 0.9800 . ? 
C15 H15C 0.9800 . ? 
C16 C17 1.533(9) . ? 
C16 C18 1.560(9) . ? 
C16 H16 1.0000 . ? 
C17 H17A 0.9800 . ? 
C17 H17B 0.9800 . ? 
C17 H17C 0.9800 . ? 
C18 H18A 0.9800 . ? 
C18 H18B 0.9800 . ? 
C18 H18C 0.9800 . ? 
C19 C21 1.538(9) . ? 
C19 C20 1.542(10) . ? 
C19 H19 1.0000 . ? 
C20 H20A 0.9800 . ? 
C20 H20B 0.9800 . ? 
C20 H20C 0.9800 . ? 
C21 H21A 0.9800 . ? 
C21 H21B 0.9800 . ? 
C21 H21C 0.9800 . ? 
C22 C24 1.552(8) . ? 
C22 C23 1.554(9) . ? 
C22 H22 1.0000 . ? 
C23 H23A 0.9800 . ? 
C23 H23B 0.9800 . ? 
C23 H23C 0.9800 . ? 
C24 H24A 0.9800 . ? 
C24 H24B 0.9800 . ? 
C24 H24C 0.9800 . ? 
C25 C26 1.525(8) . ? 
C25 C27 1.557(8) . ? 
C25 H25 1.0000 . ? 
C26 H26A 0.9800 . ? 
C26 H26B 0.9800 . ? 
C26 H26C 0.9800 . ? 
C27 H27A 0.9800 . ? 
C27 H27B 0.9800 . ? 
C27 H27C 0.9800 . ? 
C28 C30 1.520(9) . ? 
C28 C29 1.542(9) . ? 
C28 H28 1.0000 . ? 
C29 H29A 0.9800 . ? 
C29 H29B 0.9800 . ? 
C29 H29C 0.9800 . ? 
C30 H30A 0.9800 . ? 
C30 H30B 0.9800 . ? 
C30 H30C 0.9800 . ? 
C31 C36 1.382(9) . ? 
C31 C32 1.383(9) . ? 
C32 C33 1.398(9) . ? 
C32 H32 0.9500 . ? 
C33 C34 1.377(10) . ? 
C33 H33 0.9500 . ? 
C34 C35 1.411(9) . ? 
C34 H34 0.9500 . ? 
C35 C36 1.376(8) . ? 
C35 H35 0.9500 . ? 
C37 C38 1.370(9) . ? 
C37 C42 1.378(8) . ? 
C38 C39 1.389(8) . ? 
C38 H38 0.9500 . ? 
C39 C40 1.364(9) . ? 
C39 H39 0.9500 . ? 
C40 C41 1.411(9) . ? 
C40 H40 0.9500 . ? 
C41 C42 1.381(8) . ? 
C41 H41 0.9500 . ? 
C43 C44 1.537(9) . ? 
C43 C45 1.540(9) . ? 
C43 H43 1.0000 . ? 
C44 H44A 0.9800 . ? 
C44 H44B 0.9800 . ? 
C44 H44C 0.9800 . ? 
C45 H45A 0.9800 . ? 
C45 H45B 0.9800 . ? 
C45 H45C 0.9800 . ? 
C46 C47 1.530(9) . ? 
C46 C48 1.534(8) . ? 
C46 H46 1.0000 . ? 
C47 H47A 0.9800 . ? 
C47 H47B 0.9800 . ? 
C47 H47C 0.9800 . ? 
C48 H48A 0.9800 . ? 
C48 H48B 0.9800 . ? 
C48 H48C 0.9800 . ? 
C49 C51 1.509(8) . ? 
C49 C50 1.515(8) . ? 
C49 H49 1.0000 . ? 
C50 H50A 0.9800 . ? 
C50 H50B 0.9800 . ? 
C50 H50C 0.9800 . ? 
C51 H51A 0.9800 . ? 
C51 H51B 0.9800 . ? 
C51 H51C 0.9800 . ? 
C52 C54 1.506(9) . ? 
C52 C53 1.544(9) . ? 
C52 H52 1.0000 . ? 
C53 H53A 0.9800 . ? 
C53 H53B 0.9800 . ? 
C53 H53C 0.9800 . ? 
C54 H54A 0.9800 . ? 
C54 H54B 0.9800 . ? 
C54 H54C 0.9800 . ? 
C55 C57 1.508(9) . ? 
C55 C56 1.518(9) . ? 
C55 H55 1.0000 . ? 
C56 H56A 0.9800 . ? 
C56 H56B 0.9800 . ? 
C56 H56C 0.9800 . ? 
C57 H57A 0.9800 . ? 
C57 H57B 0.9800 . ? 
C57 H57C 0.9800 . ? 
C58 C59 1.519(9) . ? 
C58 C60 1.537(8) . ? 
C58 H58 1.0000 . ? 
C59 H59A 0.9800 . ? 
C59 H59B 0.9800 . ? 
C59 H59C 0.9800 . ? 
C60 H60A 0.9800 . ? 
C60 H60B 0.9800 . ? 
C60 H60C 0.9800 . ? 
 
loop_ 
 _geom_angle_atom_site_label_1 
 _geom_angle_atom_site_label_2 
 _geom_angle_atom_site_label_3 
 _geom_angle 
 _geom_angle_site_symmetry_1 
 _geom_angle_site_symmetry_3 
 _geom_angle_publ_flag 
B2 Os1 B1 111.9(3) . . ? 
B2 Os1 Cl1 124.0(2) . . ? 
B1 Os1 Cl1 124.1(2) . . ? 
B2 Os1 P2 91.10(19) . . ? 
B1 Os1 P2 90.1(2) . . ? 
Cl1 Os1 P2 87.44(5) . . ? 
B2 Os1 P1 91.32(19) . . ? 
B1 Os1 P1 93.7(2) . . ? 
Cl1 Os1 P1 86.97(5) . . ? 
P2 Os1 P1 174.35(6) . . ? 
B2 Os1 H01 58(2) . . ? 
B1 Os1 H01 54(2) . . ? 
Cl1 Os1 H01 176(2) . . ? 
P2 Os1 H01 96(2) . . ? 
P1 Os1 H01 90(2) . . ? 
B4 Os2 B3 113.1(3) . . ? 
B4 Os2 P4 92.26(19) . . ? 
B3 Os2 P4 91.6(2) . . ? 
B4 Os2 Cl2 125.54(19) . . ? 
B3 Os2 Cl2 121.3(2) . . ? 
P4 Os2 Cl2 88.09(5) . . ? 
B4 Os2 P3 89.02(19) . . ? 
B3 Os2 P3 90.8(2) . . ? 
P4 Os2 P3 176.59(6) . . ? 
Cl2 Os2 P3 88.60(5) . . ? 
B4 Os2 H02 57(2) . . ? 
B3 Os2 H02 56(2) . . ? 
P4 Os2 H02 94(2) . . ? 
Cl2 Os2 H02 177(2) . . ? 
P3 Os2 H02 90(2) . . ? 
C13 P1 C19 105.5(3) . . ? 
C13 P1 C16 101.7(3) . . ? 
C19 P1 C16 105.8(3) . . ? 
C13 P1 Os1 118.4(2) . . ? 
C19 P1 Os1 113.7(2) . . ? 
C16 P1 Os1 110.4(2) . . ? 
C22 P2 C28 105.6(3) . . ? 
C22 P2 C25 99.1(3) . . ? 
C28 P2 C25 101.6(3) . . ? 
C22 P2 Os1 111.29(19) . . ? 
C28 P2 Os1 121.6(2) . . ? 
C25 P2 Os1 114.8(2) . . ? 
C43 P3 C46 106.1(3) . . ? 
C43 P3 C49 101.2(3) . . ? 
C46 P3 C49 99.0(3) . . ? 
C43 P3 Os2 119.8(2) . . ? 
C46 P3 Os2 112.4(2) . . ? 
C49 P3 Os2 115.88(19) . . ? 
C52 P4 C58 104.6(3) . . ? 
C52 P4 C55 103.1(3) . . ? 
C58 P4 C55 99.0(3) . . ? 
C52 P4 Os2 117.1(2) . . ? 
C58 P4 Os2 115.7(2) . . ? 
C55 P4 Os2 114.9(2) . . ? 
C1 O1 B1 107.0(5) . . ? 
C6 O2 B1 106.5(5) . . ? 
C7 O3 B2 107.4(5) . . ? 
C12 O4 B2 106.6(5) . . ? 
C31 O5 B4 107.1(5) . . ? 
C36 O6 B4 107.2(5) . . ? 
C37 O7 B3 106.5(5) . . ? 
C42 O8 B3 106.0(5) . . ? 
O2 B1 O1 107.3(6) . . ? 
O2 B1 Os1 135.0(5) . . ? 
O1 B1 Os1 117.7(5) . . ? 
O4 B2 O3 107.6(5) . . ? 
O4 B2 Os1 134.2(5) . . ? 
O3 B2 Os1 118.2(5) . . ? 
O8 B3 O7 108.3(6) . . ? 
O8 B3 Os2 135.3(5) . . ? 
O7 B3 Os2 116.4(5) . . ? 
O6 B4 O5 106.9(5) . . ? 
O6 B4 Os2 136.1(5) . . ? 
O5 B4 Os2 116.9(4) . . ? 
C6 C1 O1 109.5(6) . . ? 
C6 C1 C2 122.8(7) . . ? 
O1 C1 C2 127.7(7) . . ? 
C1 C2 C3 115.7(8) . . ? 
C1 C2 H2 122.1 . . ? 
C3 C2 H2 122.1 . . ? 
C4 C3 C2 122.1(8) . . ? 
C4 C3 H3 119.0 . . ? 
C2 C3 H3 119.0 . . ? 
C3 C4 C5 122.1(7) . . ? 
C3 C4 H4 119.0 . . ? 
C5 C4 H4 119.0 . . ? 
C6 C5 C4 115.1(7) . . ? 
C6 C5 H5 122.5 . . ? 
C4 C5 H5 122.5 . . ? 
C1 C6 C5 122.2(7) . . ? 
C1 C6 O2 109.7(6) . . ? 
C5 C6 O2 128.0(7) . . ? 
O3 C7 C8 129.1(7) . . ? 
O3 C7 C12 109.1(6) . . ? 
C8 C7 C12 121.8(7) . . ? 
C9 C8 C7 116.3(8) . . ? 
C9 C8 H8 121.9 . . ? 
C7 C8 H8 121.9 . . ? 
C8 C9 C10 122.0(7) . . ? 
C8 C9 H9 119.0 . . ? 
C10 C9 H9 119.0 . . ? 
C9 C10 C11 122.0(7) . . ? 
C9 C10 H10 119.0 . . ? 
C11 C10 H10 119.0 . . ? 
C12 C11 C10 115.4(8) . . ? 
C12 C11 H11 122.3 . . ? 
C10 C11 H11 122.3 . . ? 
C11 C12 C7 122.4(7) . . ? 
C11 C12 O4 128.3(7) . . ? 
C7 C12 O4 109.3(6) . . ? 
C14 C13 C15 110.1(6) . . ? 
C14 C13 P1 113.9(5) . . ? 
C15 C13 P1 111.5(5) . . ? 
C14 C13 H13 107.0 . . ? 
C15 C13 H13 107.0 . . ? 
P1 C13 H13 107.0 . . ? 
C13 C14 H14A 109.5 . . ? 
C13 C14 H14B 109.5 . . ? 
H14A C14 H14B 109.5 . . ? 
C13 C14 H14C 109.5 . . ? 
H14A C14 H14C 109.5 . . ? 
H14B C14 H14C 109.5 . . ? 
C13 C15 H15A 109.5 . . ? 
C13 C15 H15B 109.5 . . ? 
H15A C15 H15B 109.5 . . ? 
C13 C15 H15C 109.5 . . ? 
H15A C15 H15C 109.5 . . ? 
H15B C15 H15C 109.5 . . ? 
C17 C16 C18 108.6(6) . . ? 
C17 C16 P1 114.2(5) . . ? 
C18 C16 P1 116.3(5) . . ? 
C17 C16 H16 105.6 . . ? 
C18 C16 H16 105.6 . . ? 
P1 C16 H16 105.6 . . ? 
C16 C17 H17A 109.5 . . ? 
C16 C17 H17B 109.5 . . ? 
H17A C17 H17B 109.5 . . ? 
C16 C17 H17C 109.5 . . ? 
H17A C17 H17C 109.5 . . ? 
H17B C17 H17C 109.5 . . ? 
C16 C18 H18A 109.5 . . ? 
C16 C18 H18B 109.5 . . ? 
H18A C18 H18B 109.5 . . ? 
C16 C18 H18C 109.5 . . ? 
H18A C18 H18C 109.5 . . ? 
H18B C18 H18C 109.5 . . ? 
C21 C19 C20 109.1(6) . . ? 
C21 C19 P1 115.6(5) . . ? 
C20 C19 P1 114.7(4) . . ? 
C21 C19 H19 105.5 . . ? 
C20 C19 H19 105.5 . . ? 
P1 C19 H19 105.5 . . ? 
C19 C20 H20A 109.5 . . ? 
C19 C20 H20B 109.5 . . ? 
H20A C20 H20B 109.5 . . ? 
C19 C20 H20C 109.5 . . ? 
H20A C20 H20C 109.5 . . ? 
H20B C20 H20C 109.5 . . ? 
C19 C21 H21A 109.5 . . ? 
C19 C21 H21B 109.5 . . ? 
H21A C21 H21B 109.5 . . ? 
C19 C21 H21C 109.5 . . ? 
H21A C21 H21C 109.5 . . ? 
H21B C21 H21C 109.5 . . ? 
C24 C22 C23 109.6(5) . . ? 
C24 C22 P2 116.1(4) . . ? 
C23 C22 P2 113.2(4) . . ? 
C24 C22 H22 105.7 . . ? 
C23 C22 H22 105.7 . . ? 
P2 C22 H22 105.7 . . ? 
C22 C23 H23A 109.5 . . ? 
C22 C23 H23B 109.5 . . ? 
H23A C23 H23B 109.5 . . ? 
C22 C23 H23C 109.5 . . ? 
H23A C23 H23C 109.5 . . ? 
H23B C23 H23C 109.5 . . ? 
C22 C24 H24A 109.5 . . ? 
C22 C24 H24B 109.5 . . ? 
H24A C24 H24B 109.5 . . ? 
C22 C24 H24C 109.5 . . ? 
H24A C24 H24C 109.5 . . ? 
H24B C24 H24C 109.5 . . ? 
C26 C25 C27 109.5(5) . . ? 
C26 C25 P2 113.1(4) . . ? 
C27 C25 P2 115.1(4) . . ? 
C26 C25 H25 106.1 . . ? 
C27 C25 H25 106.1 . . ? 
P2 C25 H25 106.1 . . ? 
C25 C26 H26A 109.5 . . ? 
C25 C26 H26B 109.5 . . ? 
H26A C26 H26B 109.5 . . ? 
C25 C26 H26C 109.5 . . ? 
H26A C26 H26C 109.5 . . ? 
H26B C26 H26C 109.5 . . ? 
C25 C27 H27A 109.5 . . ? 
C25 C27 H27B 109.5 . . ? 
H27A C27 H27B 109.5 . . ? 
C25 C27 H27C 109.5 . . ? 
H27A C27 H27C 109.5 . . ? 
H27B C27 H27C 109.5 . . ? 
C30 C28 C29 108.2(5) . . ? 
C30 C28 P2 113.2(4) . . ? 
C29 C28 P2 114.9(4) . . ? 
C30 C28 H28 106.7 . . ? 
C29 C28 H28 106.7 . . ? 
P2 C28 H28 106.7 . . ? 
C28 C29 H29A 109.5 . . ? 
C28 C29 H29B 109.5 . . ? 
H29A C29 H29B 109.5 . . ? 
C28 C29 H29C 109.5 . . ? 
H29A C29 H29C 109.5 . . ? 
H29B C29 H29C 109.5 . . ? 
C28 C30 H30A 109.5 . . ? 
C28 C30 H30B 109.5 . . ? 
H30A C30 H30B 109.5 . . ? 
C28 C30 H30C 109.5 . . ? 
H30A C30 H30C 109.5 . . ? 
H30B C30 H30C 109.5 . . ? 
O5 C31 C36 109.1(5) . . ? 
O5 C31 C32 128.6(6) . . ? 
C36 C31 C32 122.3(6) . . ? 
C31 C32 C33 115.3(6) . . ? 
C31 C32 H32 122.3 . . ? 
C33 C32 H32 122.3 . . ? 
C34 C33 C32 122.8(6) . . ? 
C34 C33 H33 118.6 . . ? 
C32 C33 H33 118.6 . . ? 
C33 C34 C35 121.1(6) . . ? 
C33 C34 H34 119.4 . . ? 
C35 C34 H34 119.4 . . ? 
C36 C35 C34 115.7(6) . . ? 
C36 C35 H35 122.1 . . ? 
C34 C35 H35 122.1 . . ? 
C35 C36 O6 127.6(6) . . ? 
C35 C36 C31 122.7(6) . . ? 
O6 C36 C31 109.7(5) . . ? 
C38 C37 O7 129.0(6) . . ? 
C38 C37 C42 122.1(6) . . ? 
O7 C37 C42 108.8(6) . . ? 
C37 C38 C39 117.1(6) . . ? 
C37 C38 H38 121.5 . . ? 
C39 C38 H38 121.5 . . ? 
C40 C39 C38 121.6(6) . . ? 
C40 C39 H39 119.2 . . ? 
C38 C39 H39 119.2 . . ? 
C39 C40 C41 121.4(6) . . ? 
C39 C40 H40 119.3 . . ? 
C41 C40 H40 119.3 . . ? 
C42 C41 C40 116.4(6) . . ? 
C42 C41 H41 121.8 . . ? 
C40 C41 H41 121.8 . . ? 
C37 C42 C41 121.4(6) . . ? 
C37 C42 O8 110.4(5) . . ? 
C41 C42 O8 128.2(6) . . ? 
C44 C43 C45 108.4(5) . . ? 
C44 C43 P3 115.2(5) . . ? 
C45 C43 P3 113.8(4) . . ? 
C44 C43 H43 106.3 . . ? 
C45 C43 H43 106.3 . . ? 
P3 C43 H43 106.3 . . ? 
C43 C44 H44A 109.5 . . ? 
C43 C44 H44B 109.5 . . ? 
H44A C44 H44B 109.5 . . ? 
C43 C44 H44C 109.5 . . ? 
H44A C44 H44C 109.5 . . ? 
H44B C44 H44C 109.5 . . ? 
C43 C45 H45A 109.5 . . ? 
C43 C45 H45B 109.5 . . ? 
H45A C45 H45B 109.5 . . ? 
C43 C45 H45C 109.5 . . ? 
H45A C45 H45C 109.5 . . ? 
H45B C45 H45C 109.5 . . ? 
C47 C46 C48 110.6(5) . . ? 
C47 C46 P3 115.8(5) . . ? 
C48 C46 P3 114.4(4) . . ? 
C47 C46 H46 104.9 . . ? 
C48 C46 H46 104.9 . . ? 
P3 C46 H46 104.9 . . ? 
C46 C47 H47A 109.5 . . ? 
C46 C47 H47B 109.5 . . ? 
H47A C47 H47B 109.5 . . ? 
C46 C47 H47C 109.5 . . ? 
H47A C47 H47C 109.5 . . ? 
H47B C47 H47C 109.5 . . ? 
C46 C48 H48A 109.5 . . ? 
C46 C48 H48B 109.5 . . ? 
H48A C48 H48B 109.5 . . ? 
C46 C48 H48C 109.5 . . ? 
H48A C48 H48C 109.5 . . ? 
H48B C48 H48C 109.5 . . ? 
C51 C49 C50 111.5(5) . . ? 
C51 C49 P3 116.4(4) . . ? 
C50 C49 P3 111.5(4) . . ? 
C51 C49 H49 105.5 . . ? 
C50 C49 H49 105.5 . . ? 
P3 C49 H49 105.5 . . ? 
C49 C50 H50A 109.5 . . ? 
C49 C50 H50B 109.5 . . ? 
H50A C50 H50B 109.5 . . ? 
C49 C50 H50C 109.5 . . ? 
H50A C50 H50C 109.5 . . ? 
H50B C50 H50C 109.5 . . ? 
C49 C51 H51A 109.5 . . ? 
C49 C51 H51B 109.5 . . ? 
H51A C51 H51B 109.5 . . ? 
C49 C51 H51C 109.5 . . ? 
H51A C51 H51C 109.5 . . ? 
H51B C51 H51C 109.5 . . ? 
C54 C52 C53 107.6(6) . . ? 
C54 C52 P4 114.0(5) . . ? 
C53 C52 P4 113.7(5) . . ? 
C54 C52 H52 107.0 . . ? 
C53 C52 H52 107.0 . . ? 
P4 C52 H52 107.0 . . ? 
C52 C53 H53A 109.5 . . ? 
C52 C53 H53B 109.5 . . ? 
H53A C53 H53B 109.5 . . ? 
C52 C53 H53C 109.5 . . ? 
H53A C53 H53C 109.5 . . ? 
H53B C53 H53C 109.5 . . ? 
C52 C54 H54A 109.5 . . ? 
C52 C54 H54B 109.5 . . ? 
H54A C54 H54B 109.5 . . ? 
C52 C54 H54C 109.5 . . ? 
H54A C54 H54C 109.5 . . ? 
H54B C54 H54C 109.5 . . ? 
C57 C55 C56 111.5(5) . . ? 
C57 C55 P4 115.9(5) . . ? 
C56 C55 P4 110.9(4) . . ? 
C57 C55 H55 105.9 . . ? 
C56 C55 H55 105.9 . . ? 
P4 C55 H55 105.9 . . ? 
C55 C56 H56A 109.5 . . ? 
C55 C56 H56B 109.5 . . ? 
H56A C56 H56B 109.5 . . ? 
C55 C56 H56C 109.5 . . ? 
H56A C56 H56C 109.5 . . ? 
H56B C56 H56C 109.5 . . ? 
C55 C57 H57A 109.5 . . ? 
C55 C57 H57B 109.5 . . ? 
H57A C57 H57B 109.5 . . ? 
C55 C57 H57C 109.5 . . ? 
H57A C57 H57C 109.5 . . ? 
H57B C57 H57C 109.5 . . ? 
C59 C58 C60 111.4(5) . . ? 
C59 C58 P4 114.2(4) . . ? 
C60 C58 P4 114.5(4) . . ? 
C59 C58 H58 105.2 . . ? 
C60 C58 H58 105.2 . . ? 
P4 C58 H58 105.2 . . ? 
C58 C59 H59A 109.5 . . ? 
C58 C59 H59B 109.5 . . ? 
H59A C59 H59B 109.5 . . ? 
C58 C59 H59C 109.5 . . ? 
H59A C59 H59C 109.5 . . ? 
H59B C59 H59C 109.5 . . ? 
C58 C60 H60A 109.5 . . ? 
C58 C60 H60B 109.5 . . ? 
H60A C60 H60B 109.5 . . ? 
C58 C60 H60C 109.5 . . ? 
H60A C60 H60C 109.5 . . ? 
H60B C60 H60C 109.5 . . ? 
 
_diffrn_measured_fraction_theta_max    0.964 
_diffrn_reflns_theta_full              27.50 
_diffrn_measured_fraction_theta_full   1.000 
_refine_diff_density_max    2.624 
_refine_diff_density_min   -1.809 
_refine_diff_density_rms    0.156 

#===END
#-----------------------------------------------------------------------------80
# Data for compound 3 (local labelling enrique33) 
 
 
data_enrique33as 
 
_audit_creation_method            SHELXL-97 
_chemical_name_systematic 
; 
 ? 
; 
_chemical_name_common             ? 
_chemical_melting_point           ? 
_chemical_formula_moiety          ? 
_chemical_formula_sum 
 'C26 H46 B Cl O4 Os P2' 
_chemical_formula_weight          721.03 
 
loop_ 
 _atom_type_symbol 
 _atom_type_description 
 _atom_type_scat_dispersion_real 
 _atom_type_scat_dispersion_imag 
 _atom_type_scat_source 
 'C'  'C'   0.0033   0.0016 
 'International Tables Vol C Tables 4.2.6.8 and 6.1.1.4' 
 'H'  'H'   0.0000   0.0000 
 'International Tables Vol C Tables 4.2.6.8 and 6.1.1.4' 
 'B'  'B'   0.0013   0.0007 
 'International Tables Vol C Tables 4.2.6.8 and 6.1.1.4' 
 'O'  'O'   0.0106   0.0060 
 'International Tables Vol C Tables 4.2.6.8 and 6.1.1.4' 
 'P'  'P'   0.1023   0.0942 
 'International Tables Vol C Tables 4.2.6.8 and 6.1.1.4' 
 'Cl'  'Cl'   0.1484   0.1585 
 'International Tables Vol C Tables 4.2.6.8 and 6.1.1.4' 
 'Os'  'Os'  -1.2165   7.6030 
 'International Tables Vol C Tables 4.2.6.8 and 6.1.1.4' 
 
_symmetry_cell_setting            'orthorhombic' 
_symmetry_space_group_name_H-M    'P212121'
 
loop_ 
 _symmetry_equiv_pos_as_xyz 
 'x, y, z' 
 '-x+1/2, -y, z+1/2' 
 '-x, y+1/2, -z+1/2' 
 'x+1/2, -y+1/2, -z' 
 
_cell_length_a                    11.2704(6) 
_cell_length_b                    15.3793(9) 
_cell_length_c                    17.3091(10) 
_cell_angle_alpha                 90.00 
_cell_angle_beta                  90.00 
_cell_angle_gamma                 90.00 
_cell_volume                      3000.2(3) 
_cell_formula_units_Z             4 
_cell_measurement_temperature     100(2) 
_cell_measurement_reflns_used     8836 
_cell_measurement_theta_min       2 
_cell_measurement_theta_max       28 
 
_exptl_crystal_description        'irregular block' 
_exptl_crystal_colour             'colorless'
_exptl_crystal_size_max           0.04 
_exptl_crystal_size_mid           0.04 
_exptl_crystal_size_min           0.02 
_exptl_crystal_density_meas       ? 
_exptl_crystal_density_diffrn     1.596 
_exptl_crystal_density_method     'not measured' 
_exptl_crystal_F_000              1448 
_exptl_absorpt_coefficient_mu     4.475 
_exptl_absorpt_correction_type    'multi-scan' 
_exptl_absorpt_correction_T_min   0.643 
_exptl_absorpt_correction_T_max   0.862 
_exptl_absorpt_process_details    
;
 Absorption correction performed with SADABS program. This is based on the
method of Blessing: Blessing, R. H., Acta Crystallogr., Sect. A 1995, 51, 33.
; 
 
_diffrn_ambient_temperature       100(2) 
_diffrn_radiation_wavelength      0.71073 
_diffrn_radiation_type            MoK\a 
_diffrn_radiation_source          'normal-focus sealed tube' 
_diffrn_radiation_monochromator   graphite 
_diffrn_measurement_device_type   'Bruker SMART APEX CCD system'    
_diffrn_measurement_method        '\w rotations with narrow frames' 
_diffrn_detector_area_resol_mean  8.26 
_diffrn_standards_decay_%         0
_diffrn_reflns_number             28023 
_diffrn_reflns_av_R_equivalents   0.0437 
_diffrn_reflns_av_sigmaI/netI     0.0500 
_diffrn_reflns_limit_h_min        -15 
_diffrn_reflns_limit_h_max        15 
_diffrn_reflns_limit_k_min        -20 
_diffrn_reflns_limit_k_max        19 
_diffrn_reflns_limit_l_min        -23 
_diffrn_reflns_limit_l_max        22 
_diffrn_reflns_theta_min          1.77 
_diffrn_reflns_theta_max          28.73 
_reflns_number_total              7212 
_reflns_number_gt                 6196 
_reflns_threshold_expression      >2sigma(I) 
 
_computing_data_collection        'apex2 v. 7.0 (Bruker AXS, 2009)' 
_computing_cell_refinement        'SAINT+ v. 7.56a (Bruker AXS, 2008)' 
_computing_data_reduction         'SAINT+ v. 7.56a (Bruker AXS, 2008)' 
_computing_structure_solution     'SHELXS-97 (Sheldrick, 1990)' 
_computing_structure_refinement   'SHELXL-97 (Sheldrick, 1997)' 
_computing_molecular_graphics     'XP, SHELXTL v. 6.14 (Bruker, 2000)' 
_computing_publication_material   'XCIF, SHELXTL v. 6.14 (Bruker, 2000)'
 
_refine_special_details 
; 
 Refinement of F^2^ against ALL reflections.  The weighted R-factor wR and 
 goodness of fit S are based on F^2^, conventional R-factors R are based 
 on F, with F set to zero for negative F^2^. The threshold expression of 
 F^2^ > 2sigma(F^2^) is used only for calculating R-factors(gt) etc. and is 
 not relevant to the choice of reflections for refinement.  R-factors based 
 on F^2^ are statistically about twice as large as those based on F, and R- 
 factors based on ALL data will be even larger. 
; 
 
_refine_ls_structure_factor_coef  Fsqd  
_refine_ls_matrix_type            full 
_refine_ls_weighting_scheme       calc  
_refine_ls_weighting_details 
 'calc w=1/[\s^2^(Fo^2^)+(0.0100P)^2^+0.0000P] where P=(Fo^2^+2Fc^2^)/3' 
_atom_sites_solution_primary      direct 
_atom_sites_solution_secondary    difmap 
_atom_sites_solution_hydrogens    geom 
_refine_ls_hydrogen_treatment     'constr' 
_refine_ls_extinction_method      none 
_refine_ls_extinction_coef        ? 
_refine_ls_abs_structure_details 
 'Flack H D (1983), Acta Cryst. A39, 876-881' 
_refine_ls_abs_structure_Flack    0.018(18) 
_refine_ls_number_reflns          7212 
_refine_ls_number_parameters      318 
_refine_ls_number_restraints      24 
_refine_ls_R_factor_all           0.0390 
_refine_ls_R_factor_gt            0.0288 
_refine_ls_wR_factor_ref          0.0541 
_refine_ls_wR_factor_gt           0.0517 
_refine_ls_goodness_of_fit_ref    1.056 
_refine_ls_restrained_S_all       3.279 
_refine_ls_shift/su_max           0.007 
_refine_ls_shift/su_mean          0.000 
 
loop_ 
 _atom_site_label 
 _atom_site_type_symbol 
 _atom_site_fract_x 
 _atom_site_fract_y 
 _atom_site_fract_z 
 _atom_site_U_iso_or_equiv 
 _atom_site_adp_type 
 _atom_site_occupancy 
 _atom_site_symmetry_multiplicity 
 _atom_site_calc_flag 
 _atom_site_refinement_flags 
 _atom_site_disorder_assembly 
 _atom_site_disorder_group 
Os Os 1.00284(6) 0.06240(3) 0.56800(3) 0.01934(13) Uani 1 1 d D . . 
P1 P 1.0232(3) -0.0619(2) 0.4819(2) 0.0237(8) Uani 1 1 d D A . 
P2 P 0.9757(3) 0.1853(2) 0.6547(2) 0.0273(9) Uani 1 1 d D A . 
Cl1A Cl 1.1108(5) -0.0315(4) 0.6622(3) 0.0268(13) Uiso 0.707(11) 1 d PD A 1 
C25A C 0.9226(18) 0.1188(14) 0.4917(13) 0.027(3) Uiso 0.707(11) 1 d PD A 1 
O3A O 0.8716(14) 0.1512(10) 0.4436(10) 0.027(3) Uiso 0.707(11) 1 d PD A 1 
Cl1B Cl 0.8884(13) 0.1418(10) 0.4660(8) 0.0268(13) Uiso 0.293(11) 1 d PD A 2 
C25B C 1.075(4) 0.003(3) 0.644(2) 0.027(3) Uiso 0.293(11) 1 d PD A 2 
O3B O 1.122(3) -0.036(2) 0.690(2) 0.027(3) Uiso 0.293(11) 1 d PD A 2 
O1 O 0.7240(8) 0.0242(6) 0.5808(5) 0.025(2) Uani 1 1 d . . . 
O2 O 0.8242(8) -0.0353(6) 0.6825(5) 0.021(2) Uani 1 1 d . . . 
O4 O 1.2522(9) 0.1417(7) 0.5392(6) 0.036(3) Uani 1 1 d . . . 
B B 0.8386(13) 0.0125(10) 0.6122(9) 0.020(3) Uani 1 1 d . A . 
C1 C 0.6455(12) -0.0167(9) 0.6286(8) 0.025(3) Uani 1 1 d . A . 
C2 C 0.7056(11) -0.0534(9) 0.6903(8) 0.023(3) Uani 1 1 d . A . 
C3 C 0.6483(13) -0.1004(10) 0.7466(8) 0.029(3) Uani 1 1 d . . . 
H3 H 0.6901 -0.1261 0.7884 0.034 Uiso 1 1 calc R A . 
C4 C 0.5253(14) -0.1084(10) 0.7392(9) 0.037(4) Uani 1 1 d . A . 
H4 H 0.4823 -0.1406 0.7767 0.045 Uiso 1 1 calc R . . 
C5 C 0.4656(12) -0.0710(11) 0.6792(9) 0.040(4) Uani 1 1 d . . . 
H5 H 0.3819 -0.0775 0.6764 0.048 Uiso 1 1 calc R A . 
C6 C 0.5232(12) -0.0235(10) 0.6219(9) 0.037(4) Uani 1 1 d . A . 
H6 H 0.4810 0.0028 0.5805 0.045 Uiso 1 1 calc R . . 
C7A C 0.993(2) -0.1672(11) 0.5335(13) 0.022(3) Uiso 0.60(3) 1 d PD A 1 
H7A H 1.0258 -0.1598 0.5868 0.026 Uiso 0.60(3) 1 calc PR A 1 
C8A C 0.861(2) -0.1905(18) 0.5445(16) 0.029(2) Uiso 0.60(3) 1 d PD A 1 
H8A1 H 0.8284 -0.2119 0.4956 0.044 Uiso 0.60(3) 1 calc PR A 1 
H8A2 H 0.8171 -0.1387 0.5608 0.044 Uiso 0.60(3) 1 calc PR A 1 
H8A3 H 0.8536 -0.2358 0.5841 0.044 Uiso 0.60(3) 1 calc PR A 1 
C9A C 1.059(2) -0.2468(15) 0.4981(17) 0.029(2) Uiso 0.60(3) 1 d PD A 1 
H9A1 H 1.0326 -0.3002 0.5239 0.044 Uiso 0.60(3) 1 calc PR A 1 
H9A2 H 1.1447 -0.2397 0.5055 0.044 Uiso 0.60(3) 1 calc PR A 1 
H9A3 H 1.0414 -0.2506 0.4428 0.044 Uiso 0.60(3) 1 calc PR A 1 
C7B C 1.022(3) -0.1740(16) 0.5200(19) 0.022(3) Uiso 0.40(3) 1 d PD A 2 
H7B H 1.0903 -0.1777 0.5570 0.026 Uiso 0.40(3) 1 calc PR A 2 
C8B C 0.909(3) -0.188(2) 0.569(2) 0.029(2) Uiso 0.40(3) 1 d PD A 2 
H8B1 H 0.9107 -0.2465 0.5915 0.044 Uiso 0.40(3) 1 calc PR A 2 
H8B2 H 0.8390 -0.1828 0.5352 0.044 Uiso 0.40(3) 1 calc PR A 2 
H8B3 H 0.9051 -0.1445 0.6096 0.044 Uiso 0.40(3) 1 calc PR A 2 
C9B C 1.036(3) -0.251(2) 0.465(2) 0.029(2) Uiso 0.40(3) 1 d PD A 2 
H9B1 H 1.0577 -0.3030 0.4940 0.044 Uiso 0.40(3) 1 calc PR A 2 
H9B2 H 1.0988 -0.2380 0.4270 0.044 Uiso 0.40(3) 1 calc PR A 2 
H9B3 H 0.9613 -0.2609 0.4374 0.044 Uiso 0.40(3) 1 calc PR A 2 
C10 C 0.9288(11) -0.0568(10) 0.3938(8) 0.027(3) Uani 1 1 d . . . 
H10 H 0.9464 0.0017 0.3713 0.032 Uiso 1 1 calc R A . 
C11 C 0.7954(13) -0.0555(13) 0.4074(9) 0.039(4) Uani 1 1 d . A . 
H11A H 0.7550 -0.0369 0.3600 0.059 Uiso 1 1 calc R . . 
H11B H 0.7768 -0.0149 0.4493 0.059 Uiso 1 1 calc R . . 
H11C H 0.7684 -0.1140 0.4215 0.059 Uiso 1 1 calc R . . 
C12 C 0.9602(14) -0.1209(11) 0.3284(9) 0.046(5) Uani 1 1 d . A . 
H12A H 0.9414 -0.1803 0.3448 0.070 Uiso 1 1 calc R . . 
H12B H 1.0451 -0.1166 0.3166 0.070 Uiso 1 1 calc R . . 
H12C H 0.9141 -0.1064 0.2821 0.070 Uiso 1 1 calc R . . 
C13 C 1.1737(12) -0.0707(10) 0.4388(9) 0.029(3) Uani 1 1 d . . . 
H13 H 1.1749 -0.1251 0.4073 0.035 Uiso 1 1 calc R A . 
C14 C 1.2714(12) -0.0797(9) 0.5005(9) 0.033(4) Uani 1 1 d . A . 
H14A H 1.3482 -0.0885 0.4751 0.049 Uiso 1 1 calc R . . 
H14B H 1.2539 -0.1297 0.5337 0.049 Uiso 1 1 calc R . . 
H14C H 1.2744 -0.0268 0.5319 0.049 Uiso 1 1 calc R . . 
C15 C 1.1993(13) 0.0053(10) 0.3834(8) 0.031(4) Uani 1 1 d . A . 
H15A H 1.1769 0.0602 0.4081 0.046 Uiso 1 1 calc R . . 
H15B H 1.1532 -0.0024 0.3358 0.046 Uiso 1 1 calc R . . 
H15C H 1.2841 0.0063 0.3709 0.046 Uiso 1 1 calc R . . 
C16A C 1.0517(19) 0.2846(11) 0.6180(10) 0.022(3) Uiso 0.66(3) 1 d PD A 1 
H16A H 1.1387 0.2723 0.6203 0.026 Uiso 0.66(3) 1 calc PR A 1 
C17A C 1.031(3) 0.3668(17) 0.6668(14) 0.029(2) Uiso 0.66(3) 1 d PD A 1 
H17A H 1.0874 0.4119 0.6511 0.044 Uiso 0.66(3) 1 calc PR A 1 
H17B H 1.0427 0.3530 0.7215 0.044 Uiso 0.66(3) 1 calc PR A 1 
H17C H 0.9499 0.3877 0.6587 0.044 Uiso 0.66(3) 1 calc PR A 1 
C18A C 1.0236(19) 0.3060(14) 0.5343(10) 0.029(2) Uiso 0.66(3) 1 d PD A 1 
H18A H 0.9385 0.3173 0.5289 0.044 Uiso 0.66(3) 1 calc PR A 1 
H18B H 1.0459 0.2567 0.5015 0.044 Uiso 0.66(3) 1 calc PR A 1 
H18C H 1.0684 0.3576 0.5186 0.044 Uiso 0.66(3) 1 calc PR A 1 
C16B C 0.984(3) 0.2967(17) 0.6040(18) 0.022(3) Uiso 0.34(3) 1 d PD A 2 
H16B H 0.9021 0.3073 0.5836 0.026 Uiso 0.34(3) 1 calc PR A 2 
C17B C 1.010(6) 0.374(3) 0.657(3) 0.029(2) Uiso 0.34(3) 1 d PD A 2 
H17D H 1.0317 0.4248 0.6254 0.044 Uiso 0.34(3) 1 calc PR A 2 
H17E H 1.0762 0.3597 0.6915 0.044 Uiso 0.34(3) 1 calc PR A 2 
H17F H 0.9396 0.3879 0.6877 0.044 Uiso 0.34(3) 1 calc PR A 2 
C18B C 1.066(4) 0.303(3) 0.533(2) 0.029(2) Uiso 0.34(3) 1 d PD A 2 
H18D H 1.0437 0.2580 0.4957 0.044 Uiso 0.34(3) 1 calc PR A 2 
H18E H 1.1482 0.2941 0.5495 0.044 Uiso 0.34(3) 1 calc PR A 2 
H18F H 1.0576 0.3604 0.5096 0.044 Uiso 0.34(3) 1 calc PR A 2 
C19 C 0.8204(12) 0.2026(9) 0.6886(8) 0.023(3) Uani 1 1 d . . . 
H19 H 0.7922 0.1444 0.7067 0.028 Uiso 1 1 calc R A . 
C20 C 0.8009(14) 0.2641(10) 0.7558(8) 0.033(4) Uani 1 1 d . A . 
H20A H 0.8191 0.3237 0.7395 0.050 Uiso 1 1 calc R . . 
H20B H 0.8529 0.2477 0.7987 0.050 Uiso 1 1 calc R . . 
H20C H 0.7179 0.2609 0.7725 0.050 Uiso 1 1 calc R . . 
C21 C 0.7385(16) 0.2277(11) 0.6220(9) 0.053(5) Uani 1 1 d . A . 
H21A H 0.6557 0.2244 0.6392 0.080 Uiso 1 1 calc R . . 
H21B H 0.7506 0.1876 0.5787 0.080 Uiso 1 1 calc R . . 
H21C H 0.7564 0.2871 0.6053 0.080 Uiso 1 1 calc R . . 
C22 C 1.0584(13) 0.1810(11) 0.7476(8) 0.037(4) Uani 1 1 d . . . 
H22 H 1.0442 0.2378 0.7742 0.044 Uiso 1 1 calc R A . 
C23 C 1.0090(18) 0.1093(10) 0.8015(8) 0.043(4) Uani 1 1 d . A . 
H23A H 1.0288 0.0520 0.7803 0.065 Uiso 1 1 calc R . . 
H23B H 0.9226 0.1151 0.8054 0.065 Uiso 1 1 calc R . . 
H23C H 1.0443 0.1154 0.8529 0.065 Uiso 1 1 calc R . . 
C24 C 1.1934(15) 0.1719(12) 0.7381(10) 0.053(5) Uani 1 1 d . A . 
H24A H 1.2320 0.1804 0.7883 0.080 Uiso 1 1 calc R . . 
H24B H 1.2221 0.2157 0.7015 0.080 Uiso 1 1 calc R . . 
H24C H 1.2121 0.1137 0.7185 0.080 Uiso 1 1 calc R . . 
C26 C 1.1597(13) 0.1124(9) 0.5441(9) 0.028(3) Uani 1 1 d . A . 
 
loop_ 
 _atom_site_aniso_label 
 _atom_site_aniso_U_11 
 _atom_site_aniso_U_22 
 _atom_site_aniso_U_33 
 _atom_site_aniso_U_23 
 _atom_site_aniso_U_13 
 _atom_site_aniso_U_12 
Os 0.0206(2) 0.0180(2) 0.0194(2) 0.0012(2) -0.0016(3) -0.0030(3) 
P1 0.026(2) 0.0190(15) 0.0263(17) 0.0010(15) -0.0063(14) -0.0018(16) 
P2 0.035(3) 0.0236(17) 0.0228(17) -0.0039(15) 0.0070(16) -0.0105(17) 
O1 0.020(5) 0.032(5) 0.025(6) 0.005(4) -0.004(4) -0.002(4) 
O2 0.016(5) 0.025(5) 0.023(5) 0.000(4) 0.000(4) -0.001(4) 
O4 0.027(6) 0.034(6) 0.046(7) -0.002(5) 0.008(5) -0.006(5) 
B 0.021(8) 0.015(8) 0.025(9) 0.000(7) -0.003(6) 0.001(6) 
C1 0.025(7) 0.025(8) 0.024(8) -0.004(6) 0.001(6) -0.001(6) 
C2 0.026(7) 0.018(7) 0.026(8) -0.009(6) 0.002(6) -0.002(6) 
C3 0.029(8) 0.032(9) 0.025(8) 0.001(7) 0.003(6) -0.002(7) 
C4 0.038(12) 0.041(9) 0.032(8) -0.006(7) 0.008(7) -0.013(8) 
C5 0.019(7) 0.061(11) 0.039(9) -0.009(9) 0.002(6) -0.009(7) 
C6 0.018(9) 0.058(10) 0.037(8) 0.006(8) -0.007(6) -0.004(7) 
C10 0.028(7) 0.028(8) 0.025(8) 0.001(7) -0.007(6) 0.003(7) 
C11 0.028(8) 0.059(12) 0.030(9) 0.001(10) -0.007(7) -0.008(9) 
C12 0.046(11) 0.052(11) 0.041(10) -0.022(9) -0.018(8) 0.012(8) 
C13 0.027(7) 0.023(8) 0.038(10) -0.011(8) -0.003(7) 0.000(6) 
C14 0.031(8) 0.023(8) 0.044(10) -0.004(7) -0.009(7) 0.006(6) 
C15 0.028(8) 0.037(10) 0.026(9) -0.006(7) 0.003(6) 0.001(7) 
C19 0.029(8) 0.016(7) 0.024(8) -0.003(6) -0.001(6) 0.001(6) 
C20 0.035(9) 0.033(9) 0.032(9) -0.007(7) 0.004(7) 0.002(7) 
C21 0.067(13) 0.055(12) 0.038(10) -0.017(9) -0.020(9) 0.043(10) 
C22 0.025(8) 0.048(11) 0.037(9) -0.025(8) 0.001(6) -0.007(7) 
C23 0.038(9) 0.067(10) 0.025(7) -0.008(7) -0.004(10) 0.009(11) 
C24 0.030(9) 0.059(14) 0.070(14) -0.028(11) 0.000(9) -0.011(9) 
C26 0.031(8) 0.021(8) 0.031(9) -0.006(6) 0.008(6) 0.003(6) 
 
_geom_special_details 
; 
 All esds (except the esd in the dihedral angle between two l.s. planes) 
 are estimated using the full covariance matrix.  The cell esds are taken 
 into account individually in the estimation of esds in distances, angles 
 and torsion angles; correlations between esds in cell parameters are only 
 used when they are defined by crystal symmetry.  An approximate (isotropic) 
 treatment of cell esds is used for estimating esds involving l.s. planes. 
; 
 
loop_ 
 _geom_bond_atom_site_label_1 
 _geom_bond_atom_site_label_2 
 _geom_bond_distance 
 _geom_bond_site_symmetry_2 
 _geom_bond_publ_flag 
Os C25B 1.80(3) . ? 
Os C25A 1.82(2) . ? 
Os C26 1.971(15) . ? 
Os B 2.145(15) . ? 
Os P2 2.433(4) . ? 
Os P1 2.435(4) . ? 
Os Cl1A 2.495(6) . ? 
Os Cl1B 2.503(14) . ? 
P1 C7B 1.85(2) . ? 
P1 C13 1.857(14) . ? 
P1 C10 1.861(13) . ? 
P1 C7A 1.881(18) . ? 
P2 C22 1.860(15) . ? 
P2 C16A 1.862(17) . ? 
P2 C19 1.865(14) . ? 
P2 C16B 1.93(3) . ? 
C25A O3A 1.13(3) . ? 
C25B O3B 1.12(4) . ? 
O1 C1 1.365(16) . ? 
O1 B 1.412(17) . ? 
O2 C2 1.372(15) . ? 
O2 B 1.431(18) . ? 
O4 C26 1.140(16) . ? 
C1 C2 1.385(19) . ? 
C1 C6 1.387(18) . ? 
C2 C3 1.374(19) . ? 
C3 C4 1.40(2) . ? 
C3 H3 0.9500 . ? 
C4 C5 1.36(2) . ? 
C4 H4 0.9500 . ? 
C5 C6 1.39(2) . ? 
C5 H5 0.9500 . ? 
C6 H6 0.9500 . ? 
C7A C8A 1.54(2) . ? 
C7A C9A 1.56(2) . ? 
C7A H7A 1.0000 . ? 
C8A H8A1 0.9800 . ? 
C8A H8A2 0.9800 . ? 
C8A H8A3 0.9800 . ? 
C9A H9A1 0.9800 . ? 
C9A H9A2 0.9800 . ? 
C9A H9A3 0.9800 . ? 
C7B C9B 1.53(3) . ? 
C7B C8B 1.54(3) . ? 
C7B H7B 1.0000 . ? 
C8B H8B1 0.9800 . ? 
C8B H8B2 0.9800 . ? 
C8B H8B3 0.9800 . ? 
C9B H9B1 0.9800 . ? 
C9B H9B2 0.9800 . ? 
C9B H9B3 0.9800 . ? 
C10 C11 1.523(19) . ? 
C10 C12 1.542(19) . ? 
C10 H10 1.0000 . ? 
C11 H11A 0.9800 . ? 
C11 H11B 0.9800 . ? 
C11 H11C 0.9800 . ? 
C12 H12A 0.9800 . ? 
C12 H12B 0.9800 . ? 
C12 H12C 0.9800 . ? 
C13 C15 1.54(2) . ? 
C13 C14 1.540(18) . ? 
C13 H13 1.0000 . ? 
C14 H14A 0.9800 . ? 
C14 H14B 0.9800 . ? 
C14 H14C 0.9800 . ? 
C15 H15A 0.9800 . ? 
C15 H15B 0.9800 . ? 
C15 H15C 0.9800 . ? 
C16A C18A 1.52(2) . ? 
C16A C17A 1.54(2) . ? 
C16A H16A 1.0000 . ? 
C17A H17A 0.9800 . ? 
C17A H17B 0.9800 . ? 
C17A H17C 0.9800 . ? 
C18A H18A 0.9800 . ? 
C18A H18B 0.9800 . ? 
C18A H18C 0.9800 . ? 
C16B C17B 1.53(3) . ? 
C16B C18B 1.54(3) . ? 
C16B H16B 1.0000 . ? 
C17B H17D 0.9800 . ? 
C17B H17E 0.9800 . ? 
C17B H17F 0.9800 . ? 
C18B H18D 0.9800 . ? 
C18B H18E 0.9800 . ? 
C18B H18F 0.9800 . ? 
C19 C20 1.516(18) . ? 
C19 C21 1.527(19) . ? 
C19 H19 1.0000 . ? 
C20 H20A 0.9800 . ? 
C20 H20B 0.9800 . ? 
C20 H20C 0.9800 . ? 
C21 H21A 0.9800 . ? 
C21 H21B 0.9800 . ? 
C21 H21C 0.9800 . ? 
C22 C24 1.54(2) . ? 
C22 C23 1.55(2) . ? 
C22 H22 1.0000 . ? 
C23 H23A 0.9800 . ? 
C23 H23B 0.9800 . ? 
C23 H23C 0.9800 . ? 
C24 H24A 0.9800 . ? 
C24 H24B 0.9800 . ? 
C24 H24C 0.9800 . ? 
 
loop_ 
 _geom_angle_atom_site_label_1 
 _geom_angle_atom_site_label_2 
 _geom_angle_atom_site_label_3 
 _geom_angle 
 _geom_angle_site_symmetry_1 
 _geom_angle_site_symmetry_3 
 _geom_angle_publ_flag 
C25B Os C25A 176.6(17) . . ? 
C25B Os C26 87.1(16) . . ? 
C25A Os C26 96.2(8) . . ? 
C25B Os B 86.8(16) . . ? 
C25A Os B 90.0(8) . . ? 
C26 Os B 171.1(6) . . ? 
C25B Os P2 90.2(16) . . ? 
C25A Os P2 90.9(7) . . ? 
C26 Os P2 86.5(4) . . ? 
B Os P2 87.1(4) . . ? 
C25B Os P1 90.2(16) . . ? 
C25A Os P1 88.7(7) . . ? 
C26 Os P1 95.4(4) . . ? 
B Os P1 91.1(4) . . ? 
P2 Os P1 178.12(12) . . ? 
C25B Os Cl1A 6.3(16) . . ? 
C25A Os Cl1A 172.8(7) . . ? 
C26 Os Cl1A 85.7(5) . . ? 
B Os Cl1A 88.9(4) . . ? 
P2 Os Cl1A 96.21(16) . . ? 
P1 Os Cl1A 84.23(16) . . ? 
C25B Os Cl1B 175.8(16) . . ? 
C25A Os Cl1B 1.7(8) . . ? 
C26 Os Cl1B 97.1(6) . . ? 
B Os Cl1B 89.0(5) . . ? 
P2 Os Cl1B 89.5(4) . . ? 
P1 Os Cl1B 90.0(4) . . ? 
Cl1A Os Cl1B 173.8(4) . . ? 
C7B P1 C13 94.6(11) . . ? 
C7B P1 C10 109.2(12) . . ? 
C13 P1 C10 101.3(6) . . ? 
C7B P1 C7A 12.9(11) . . ? 
C13 P1 C7A 107.2(9) . . ? 
C10 P1 C7A 108.8(9) . . ? 
C7B P1 Os 120.9(10) . . ? 
C13 P1 Os 112.9(5) . . ? 
C10 P1 Os 114.5(5) . . ? 
C7A P1 Os 111.6(7) . . ? 
C22 P2 C16A 95.4(8) . . ? 
C22 P2 C19 101.7(6) . . ? 
C16A P2 C19 115.0(8) . . ? 
C22 P2 C16B 113.7(12) . . ? 
C16A P2 C16B 25.0(12) . . ? 
C19 P2 C16B 93.5(12) . . ? 
C22 P2 Os 116.3(5) . . ? 
C16A P2 Os 111.7(6) . . ? 
C19 P2 Os 115.0(4) . . ? 
C16B P2 Os 113.9(9) . . ? 
O3A C25A Os 177.8(18) . . ? 
O3B C25B Os 178(5) . . ? 
C1 O1 B 107.5(10) . . ? 
C2 O2 B 107.3(10) . . ? 
O1 B O2 106.8(11) . . ? 
O1 B Os 127.3(10) . . ? 
O2 B Os 125.8(10) . . ? 
O1 C1 C2 109.7(11) . . ? 
O1 C1 C6 129.0(13) . . ? 
C2 C1 C6 121.3(13) . . ? 
O2 C2 C3 129.3(13) . . ? 
O2 C2 C1 108.6(12) . . ? 
C3 C2 C1 122.1(13) . . ? 
C2 C3 C4 116.6(14) . . ? 
C2 C3 H3 121.7 . . ? 
C4 C3 H3 121.7 . . ? 
C5 C4 C3 121.4(14) . . ? 
C5 C4 H4 119.3 . . ? 
C3 C4 H4 119.3 . . ? 
C4 C5 C6 122.2(13) . . ? 
C4 C5 H5 118.9 . . ? 
C6 C5 H5 118.9 . . ? 
C1 C6 C5 116.3(14) . . ? 
C1 C6 H6 121.8 . . ? 
C5 C6 H6 121.8 . . ? 
C8A C7A C9A 109.1(18) . . ? 
C8A C7A P1 115.8(16) . . ? 
C9A C7A P1 113.7(16) . . ? 
C8A C7A H7A 105.8 . . ? 
C9A C7A H7A 105.8 . . ? 
P1 C7A H7A 105.8 . . ? 
C9B C7B C8B 108(2) . . ? 
C9B C7B P1 120(2) . . ? 
C8B C7B P1 109(2) . . ? 
C9B C7B H7B 106.1 . . ? 
C8B C7B H7B 106.1 . . ? 
P1 C7B H7B 106.1 . . ? 
C7B C8B H8B1 109.5 . . ? 
C7B C8B H8B2 109.5 . . ? 
H8B1 C8B H8B2 109.5 . . ? 
C7B C8B H8B3 109.5 . . ? 
H8B1 C8B H8B3 109.5 . . ? 
H8B2 C8B H8B3 109.5 . . ? 
C7B C9B H9B1 109.5 . . ? 
C7B C9B H9B2 109.5 . . ? 
H9B1 C9B H9B2 109.5 . . ? 
C7B C9B H9B3 109.5 . . ? 
H9B1 C9B H9B3 109.5 . . ? 
H9B2 C9B H9B3 109.5 . . ? 
C11 C10 C12 110.4(12) . . ? 
C11 C10 P1 116.0(10) . . ? 
C12 C10 P1 116.3(10) . . ? 
C11 C10 H10 104.1 . . ? 
C12 C10 H10 104.1 . . ? 
P1 C10 H10 104.1 . . ? 
C10 C11 H11A 109.5 . . ? 
C10 C11 H11B 109.5 . . ? 
H11A C11 H11B 109.5 . . ? 
C10 C11 H11C 109.5 . . ? 
H11A C11 H11C 109.5 . . ? 
H11B C11 H11C 109.5 . . ? 
C10 C12 H12A 109.5 . . ? 
C10 C12 H12B 109.5 . . ? 
H12A C12 H12B 109.5 . . ? 
C10 C12 H12C 109.5 . . ? 
H12A C12 H12C 109.5 . . ? 
H12B C12 H12C 109.5 . . ? 
C15 C13 C14 111.5(12) . . ? 
C15 C13 P1 111.5(10) . . ? 
C14 C13 P1 112.4(10) . . ? 
C15 C13 H13 107.0 . . ? 
C14 C13 H13 107.0 . . ? 
P1 C13 H13 107.0 . . ? 
C13 C14 H14A 109.5 . . ? 
C13 C14 H14B 109.5 . . ? 
H14A C14 H14B 109.5 . . ? 
C13 C14 H14C 109.5 . . ? 
H14A C14 H14C 109.5 . . ? 
H14B C14 H14C 109.5 . . ? 
C13 C15 H15A 109.5 . . ? 
C13 C15 H15B 109.5 . . ? 
H15A C15 H15B 109.5 . . ? 
C13 C15 H15C 109.5 . . ? 
H15A C15 H15C 109.5 . . ? 
H15B C15 H15C 109.5 . . ? 
C18A C16A C17A 108.3(15) . . ? 
C18A C16A P2 114.0(14) . . ? 
C17A C16A P2 114.7(17) . . ? 
C18A C16A H16A 106.4 . . ? 
C17A C16A H16A 106.4 . . ? 
P2 C16A H16A 106.4 . . ? 
C17B C16B C18B 108(2) . . ? 
C17B C16B P2 115(3) . . ? 
C18B C16B P2 116(3) . . ? 
C17B C16B H16B 105.2 . . ? 
C18B C16B H16B 105.2 . . ? 
P2 C16B H16B 105.2 . . ? 
C16B C17B H17D 109.5 . . ? 
C16B C17B H17E 109.5 . . ? 
H17D C17B H17E 109.5 . . ? 
C16B C17B H17F 109.5 . . ? 
H17D C17B H17F 109.5 . . ? 
H17E C17B H17F 109.5 . . ? 
C16B C18B H18D 109.5 . . ? 
C16B C18B H18E 109.5 . . ? 
H18D C18B H18E 109.5 . . ? 
C16B C18B H18F 109.5 . . ? 
H18D C18B H18F 109.5 . . ? 
H18E C18B H18F 109.5 . . ? 
C20 C19 C21 109.5(11) . . ? 
C20 C19 P2 117.8(10) . . ? 
C21 C19 P2 111.5(11) . . ? 
C20 C19 H19 105.7 . . ? 
C21 C19 H19 105.7 . . ? 
P2 C19 H19 105.7 . . ? 
C19 C20 H20A 109.5 . . ? 
C19 C20 H20B 109.5 . . ? 
H20A C20 H20B 109.5 . . ? 
C19 C20 H20C 109.5 . . ? 
H20A C20 H20C 109.5 . . ? 
H20B C20 H20C 109.5 . . ? 
C19 C21 H21A 109.5 . . ? 
C19 C21 H21B 109.5 . . ? 
H21A C21 H21B 109.5 . . ? 
C19 C21 H21C 109.5 . . ? 
H21A C21 H21C 109.5 . . ? 
H21B C21 H21C 109.5 . . ? 
C24 C22 C23 110.8(15) . . ? 
C24 C22 P2 114.0(11) . . ? 
C23 C22 P2 111.5(10) . . ? 
C24 C22 H22 106.7 . . ? 
C23 C22 H22 106.7 . . ? 
P2 C22 H22 106.7 . . ? 
C22 C23 H23A 109.5 . . ? 
C22 C23 H23B 109.5 . . ? 
H23A C23 H23B 109.5 . . ? 
C22 C23 H23C 109.5 . . ? 
H23A C23 H23C 109.5 . . ? 
H23B C23 H23C 109.5 . . ? 
C22 C24 H24A 109.5 . . ? 
C22 C24 H24B 109.5 . . ? 
H24A C24 H24B 109.5 . . ? 
C22 C24 H24C 109.5 . . ? 
H24A C24 H24C 109.5 . . ? 
H24B C24 H24C 109.5 . . ? 
O4 C26 Os 172.2(13) . . ? 
 
_diffrn_measured_fraction_theta_max    0.953 
_diffrn_reflns_theta_full              27.50 
_diffrn_measured_fraction_theta_full   0.999 
_refine_diff_density_max    0.880 
_refine_diff_density_min   -1.315 
_refine_diff_density_rms    0.103 

#===END
#-----------------------------------------------------------------------------80
# Data for compound 4 (local labelling enrique31) 

 
 
data_enrique31as 
 
_audit_creation_method            SHELXL-97 
_chemical_name_systematic 
; 
 ? 
; 
_chemical_name_common             ? 
_chemical_melting_point           ? 
_chemical_formula_moiety          ? 
_chemical_formula_sum 
 'C25 H46 B Cl O3 Os P2' 
_chemical_formula_weight          693.02 
 
loop_ 
 _atom_type_symbol 
 _atom_type_description 
 _atom_type_scat_dispersion_real 
 _atom_type_scat_dispersion_imag 
 _atom_type_scat_source 
 'C'  'C'   0.0033   0.0016 
 'International Tables Vol C Tables 4.2.6.8 and 6.1.1.4' 
 'H'  'H'   0.0000   0.0000 
 'International Tables Vol C Tables 4.2.6.8 and 6.1.1.4' 
 'B'  'B'   0.0013   0.0007 
 'International Tables Vol C Tables 4.2.6.8 and 6.1.1.4' 
 'O'  'O'   0.0106   0.0060 
 'International Tables Vol C Tables 4.2.6.8 and 6.1.1.4' 
 'P'  'P'   0.1023   0.0942 
 'International Tables Vol C Tables 4.2.6.8 and 6.1.1.4' 
 'Cl'  'Cl'   0.1484   0.1585 
 'International Tables Vol C Tables 4.2.6.8 and 6.1.1.4' 
 'Os'  'Os'  -1.2165   7.6030 
 'International Tables Vol C Tables 4.2.6.8 and 6.1.1.4' 
 
_symmetry_cell_setting            'monoclinic' 
_symmetry_space_group_name_H-M    'P21/n'
 
loop_ 
 _symmetry_equiv_pos_as_xyz 
 'x, y, z' 
 '-x+1/2, y+1/2, -z+1/2' 
 '-x, -y, -z' 
 'x-1/2, -y-1/2, z-1/2' 
 
_cell_length_a                    16.246(3) 
_cell_length_b                    10.8358(18) 
_cell_length_c                    16.886(3) 
_cell_angle_alpha                 90.00 
_cell_angle_beta                  106.226(2) 
_cell_angle_gamma                 90.00 
_cell_volume                      2854.2(8) 
_cell_formula_units_Z             4 
_cell_measurement_temperature     100(2) 
_cell_measurement_reflns_used     1923 
_cell_measurement_theta_min       2 
_cell_measurement_theta_max       21 
 
_exptl_crystal_description        'irregular block' 
_exptl_crystal_colour             'yellow'
_exptl_crystal_size_max           0.17 
_exptl_crystal_size_mid           0.02 
_exptl_crystal_size_min           0.02 
_exptl_crystal_density_meas       ? 
_exptl_crystal_density_diffrn     1.613 
_exptl_crystal_density_method     'not measured' 
_exptl_crystal_F_000              1392 
_exptl_absorpt_coefficient_mu     4.697 
_exptl_absorpt_correction_type    'multi-scan' 
_exptl_absorpt_correction_T_min   0.678 
_exptl_absorpt_correction_T_max   0.862 
_exptl_absorpt_process_details    
;
 Absorption correction performed with SADABS program. This is based on the
method of Blessing: Blessing, R. H., Acta Crystallogr., Sect. A 1995, 51, 33.
; 
 
_diffrn_ambient_temperature       100(2) 
_diffrn_radiation_wavelength      0.71073 
_diffrn_radiation_type            MoK\a 
_diffrn_radiation_source          'normal-focus sealed tube' 
_diffrn_radiation_monochromator   graphite 
_diffrn_measurement_device_type   'Bruker SMART APEX CCD system'    
_diffrn_measurement_method        '\w rotations with narrow frames' 
_diffrn_detector_area_resol_mean  8.26 
_diffrn_standards_decay_%         0
_diffrn_reflns_number             23666 
_diffrn_reflns_av_R_equivalents   0.1084 
_diffrn_reflns_av_sigmaI/netI     0.1242 
_diffrn_reflns_limit_h_min        -20 
_diffrn_reflns_limit_h_max        21 
_diffrn_reflns_limit_k_min        -14 
_diffrn_reflns_limit_k_max        14 
_diffrn_reflns_limit_l_min        -22 
_diffrn_reflns_limit_l_max        22 
_diffrn_reflns_theta_min          1.54 
_diffrn_reflns_theta_max          28.66 
_reflns_number_total              6795 
_reflns_number_gt                 4203 
_reflns_threshold_expression      >2sigma(I) 
 
_computing_data_collection        'apex2 v. 7.0 (Bruker AXS, 2009)' 
_computing_cell_refinement        'SAINT+ v. 7.56a (Bruker AXS, 2008)' 
_computing_data_reduction         'SAINT+ v. 7.56a (Bruker AXS, 2008)' 
_computing_structure_solution     'SHELXS-97 (Sheldrick, 1990)' 
_computing_structure_refinement   'SHELXL-97 (Sheldrick, 1997)' 
_computing_molecular_graphics     'XP, SHELXTL v. 6.14 (Bruker, 2000)' 
_computing_publication_material   'XCIF, SHELXTL v. 6.14 (Bruker, 2000)'
 
_refine_special_details 
; 
 Refinement of F^2^ against ALL reflections.  The weighted R-factor wR and 
 goodness of fit S are based on F^2^, conventional R-factors R are based 
 on F, with F set to zero for negative F^2^. The threshold expression of 
 F^2^ > 2sigma(F^2^) is used only for calculating R-factors(gt) etc. and is 
 not relevant to the choice of reflections for refinement.  R-factors based 
 on F^2^ are statistically about twice as large as those based on F, and R- 
 factors based on ALL data will be even larger. 
; 
 
_refine_ls_structure_factor_coef  Fsqd  
_refine_ls_matrix_type            full 
_refine_ls_weighting_scheme       calc  
_refine_ls_weighting_details 
 'calc w=1/[\s^2^(Fo^2^)+(0.0434P)^2^+0.0000P] where P=(Fo^2^+2Fc^2^)/3' 
_atom_sites_solution_primary      direct 
_atom_sites_solution_secondary    difmap 
_atom_sites_solution_hydrogens    geom 
_refine_ls_hydrogen_treatment     'constr' 
_refine_ls_extinction_method      none 
_refine_ls_extinction_coef        ? 
_refine_ls_number_reflns          6795 
_refine_ls_number_parameters      305 
_refine_ls_number_restraints      8 
_refine_ls_R_factor_all           0.1107 
_refine_ls_R_factor_gt            0.0510 
_refine_ls_wR_factor_ref          0.1148 
_refine_ls_wR_factor_gt           0.0921 
_refine_ls_goodness_of_fit_ref    0.967 
_refine_ls_restrained_S_all       0.970 
_refine_ls_shift/su_max           0.005 
_refine_ls_shift/su_mean          0.000 
 
loop_ 
 _atom_site_label 
 _atom_site_type_symbol 
 _atom_site_fract_x 
 _atom_site_fract_y 
 _atom_site_fract_z 
 _atom_site_U_iso_or_equiv 
 _atom_site_adp_type 
 _atom_site_occupancy 
 _atom_site_symmetry_multiplicity 
 _atom_site_calc_flag 
 _atom_site_refinement_flags 
 _atom_site_disorder_assembly 
 _atom_site_disorder_group 
Os Os 0.738805(18) 0.71868(3) -0.00140(2) 0.02187(10) Uani 1 1 d D . . 
P1 P 0.78840(13) 0.5239(2) 0.06058(13) 0.0256(5) Uani 1 1 d . A . 
P2 P 0.66617(12) 0.8817(2) -0.08688(13) 0.0242(5) Uani 1 1 d . A . 
Cl1A Cl 0.62894(15) 0.7159(3) 0.07029(15) 0.0301(7) Uiso 0.842(5) 1 d PD A 1 
Cl1B Cl 0.8270(9) 0.6910(14) -0.0976(9) 0.0301(7) Uiso 0.158(5) 1 d PD A 2 
O3A O 0.8514(4) 0.6900(7) -0.1115(4) 0.0298(14) Uiso 0.842(5) 1 d PD A 1 
C25A C 0.8097(6) 0.7015(10) -0.0697(6) 0.0298(14) Uiso 0.842(5) 1 d PD A 1 
O3B O 0.6278(18) 0.740(3) 0.1125(18) 0.0298(14) Uiso 0.158(5) 1 d PD A 2 
C25B C 0.675(3) 0.738(5) 0.076(2) 0.0298(14) Uiso 0.158(5) 1 d PD A 2 
O1 O 0.8226(3) 0.8871(5) 0.1423(3) 0.0270(13) Uani 1 1 d . . . 
O2 O 0.9058(3) 0.8725(5) 0.0523(3) 0.0291(14) Uani 1 1 d . . . 
B B 0.8277(6) 0.8309(10) 0.0669(6) 0.032(2) Uani 1 1 d . A . 
C1 C 0.8919(5) 0.9670(8) 0.1680(5) 0.0261(19) Uani 1 1 d . A . 
C2 C 0.9413(5) 0.9566(8) 0.1135(5) 0.0264(19) Uani 1 1 d . A . 
C3 C 1.0148(5) 1.0277(8) 0.1226(5) 0.034(2) Uani 1 1 d . . . 
H3 H 1.0481 1.0243 0.0845 0.041 Uiso 1 1 calc R A . 
C4 C 1.0359(5) 1.1050(8) 0.1922(6) 0.037(2) Uani 1 1 d . A . 
H4 H 1.0862 1.1542 0.2020 0.044 Uiso 1 1 calc R . . 
C5 C 0.9873(5) 1.1126(8) 0.2468(5) 0.035(2) Uani 1 1 d . . . 
H5 H 1.0049 1.1657 0.2932 0.042 Uiso 1 1 calc R A . 
C6 C 0.9122(5) 1.0433(8) 0.2350(5) 0.030(2) Uani 1 1 d . A . 
H6 H 0.8772 1.0491 0.2715 0.036 Uiso 1 1 calc R . . 
C7 C 0.7789(5) 0.4978(8) 0.1654(5) 0.031(2) Uani 1 1 d . . . 
H7 H 0.7163 0.5057 0.1604 0.037 Uiso 1 1 calc R A . 
C8 C 0.8038(7) 0.3698(9) 0.2012(6) 0.050(3) Uani 1 1 d . A . 
H8A H 0.8658 0.3584 0.2118 0.075 Uiso 1 1 calc R . . 
H8B H 0.7735 0.3072 0.1619 0.075 Uiso 1 1 calc R . . 
H8C H 0.7882 0.3613 0.2529 0.075 Uiso 1 1 calc R . . 
C9 C 0.8225(6) 0.5972(9) 0.2270(5) 0.040(2) Uani 1 1 d . A . 
H9A H 0.8049 0.5884 0.2777 0.059 Uiso 1 1 calc R . . 
H9B H 0.8057 0.6790 0.2031 0.059 Uiso 1 1 calc R . . 
H9C H 0.8848 0.5882 0.2398 0.059 Uiso 1 1 calc R . . 
C10 C 0.8972(5) 0.4810(8) 0.0540(6) 0.033(2) Uani 1 1 d . . . 
H10 H 0.8993 0.5102 -0.0015 0.039 Uiso 1 1 calc R A . 
C11 C 0.9179(6) 0.3435(9) 0.0556(6) 0.046(3) Uani 1 1 d . A . 
H11A H 0.9754 0.3322 0.0487 0.069 Uiso 1 1 calc R . . 
H11B H 0.8758 0.3018 0.0106 0.069 Uiso 1 1 calc R . . 
H11C H 0.9160 0.3083 0.1085 0.069 Uiso 1 1 calc R . . 
C12 C 0.9682(5) 0.5508(9) 0.1150(6) 0.047(3) Uani 1 1 d . A . 
H12A H 0.9717 0.5234 0.1712 0.070 Uiso 1 1 calc R . . 
H12B H 0.9559 0.6394 0.1102 0.070 Uiso 1 1 calc R . . 
H12C H 1.0229 0.5346 0.1032 0.070 Uiso 1 1 calc R . . 
C13 C 0.7185(5) 0.4037(7) -0.0013(5) 0.0286(19) Uani 1 1 d . . . 
H13 H 0.7445 0.3219 0.0191 0.034 Uiso 1 1 calc R A . 
C14 C 0.7161(6) 0.4135(8) -0.0916(5) 0.042(2) Uani 1 1 d . A . 
H14A H 0.6861 0.3418 -0.1216 0.062 Uiso 1 1 calc R . . 
H14B H 0.7748 0.4160 -0.0965 0.062 Uiso 1 1 calc R . . 
H14C H 0.6858 0.4891 -0.1150 0.062 Uiso 1 1 calc R . . 
C15 C 0.6279(5) 0.4054(9) 0.0096(6) 0.048(3) Uani 1 1 d . A . 
H15A H 0.6045 0.4893 0.0003 0.073 Uiso 1 1 calc R . . 
H15B H 0.6302 0.3792 0.0658 0.073 Uiso 1 1 calc R . . 
H15C H 0.5910 0.3490 -0.0302 0.073 Uiso 1 1 calc R . . 
C16 C 0.5871(5) 0.8117(8) -0.1765(5) 0.029(2) Uani 1 1 d . . . 
H16 H 0.5563 0.8807 -0.2120 0.035 Uiso 1 1 calc R A . 
C17 C 0.5203(5) 0.7354(8) -0.1502(5) 0.036(2) Uani 1 1 d . A . 
H17A H 0.4803 0.6985 -0.1989 0.054 Uiso 1 1 calc R . . 
H17B H 0.4886 0.7889 -0.1221 0.054 Uiso 1 1 calc R . . 
H17C H 0.5490 0.6699 -0.1125 0.054 Uiso 1 1 calc R . . 
C18 C 0.6295(6) 0.7321(8) -0.2297(5) 0.039(2) Uani 1 1 d . A . 
H18A H 0.6521 0.6564 -0.1998 0.058 Uiso 1 1 calc R . . 
H18B H 0.6765 0.7785 -0.2416 0.058 Uiso 1 1 calc R . . 
H18C H 0.5869 0.7110 -0.2816 0.058 Uiso 1 1 calc R . . 
C19 C 0.7335(5) 0.9779(8) -0.1351(5) 0.030(2) Uani 1 1 d . . . 
H19 H 0.7781 0.9212 -0.1452 0.036 Uiso 1 1 calc R A . 
C20 C 0.7826(5) 1.0781(8) -0.0769(5) 0.034(2) Uani 1 1 d . A . 
H20A H 0.8284 1.1108 -0.0983 0.051 Uiso 1 1 calc R . . 
H20B H 0.8076 1.0428 -0.0220 0.051 Uiso 1 1 calc R . . 
H20C H 0.7432 1.1450 -0.0732 0.051 Uiso 1 1 calc R . . 
C21 C 0.6886(5) 1.0369(9) -0.2194(5) 0.040(2) Uani 1 1 d . A . 
H21A H 0.6450 1.0955 -0.2128 0.061 Uiso 1 1 calc R . . 
H21B H 0.6612 0.9723 -0.2585 0.061 Uiso 1 1 calc R . . 
H21C H 0.7311 1.0804 -0.2404 0.061 Uiso 1 1 calc R . . 
C22 C 0.5983(5) 0.9834(8) -0.0431(5) 0.0256(19) Uani 1 1 d . . . 
H22 H 0.5541 0.9279 -0.0310 0.031 Uiso 1 1 calc R A . 
C23 C 0.6450(5) 1.0412(8) 0.0392(5) 0.033(2) Uani 1 1 d . A . 
H23A H 0.6875 1.1003 0.0311 0.049 Uiso 1 1 calc R . . 
H23B H 0.6738 0.9765 0.0775 0.049 Uiso 1 1 calc R . . 
H23C H 0.6036 1.0841 0.0620 0.049 Uiso 1 1 calc R . . 
C24 C 0.5480(5) 1.0802(8) -0.1028(5) 0.033(2) Uani 1 1 d . A . 
H24A H 0.5061 1.1195 -0.0791 0.049 Uiso 1 1 calc R . . 
H24B H 0.5182 1.0406 -0.1551 0.049 Uiso 1 1 calc R . . 
H24C H 0.5876 1.1428 -0.1127 0.049 Uiso 1 1 calc R . . 
 
loop_ 
 _atom_site_aniso_label 
 _atom_site_aniso_U_11 
 _atom_site_aniso_U_22 
 _atom_site_aniso_U_33 
 _atom_site_aniso_U_23 
 _atom_site_aniso_U_13 
 _atom_site_aniso_U_12 
Os 0.02057(16) 0.02058(17) 0.02397(17) -0.00042(18) 0.00538(11) 0.00115(15) 
P1 0.0234(11) 0.0236(13) 0.0285(13) 0.0013(10) 0.0050(9) 0.0031(9) 
P2 0.0188(10) 0.0240(13) 0.0288(13) -0.0011(10) 0.0051(9) 0.0000(8) 
O1 0.028(3) 0.026(4) 0.026(3) -0.006(3) 0.007(2) -0.006(2) 
O2 0.022(3) 0.030(4) 0.033(3) -0.004(3) 0.004(2) -0.005(2) 
B 0.020(5) 0.041(7) 0.038(6) 0.013(5) 0.014(4) 0.005(4) 
C1 0.021(4) 0.027(5) 0.028(5) 0.007(4) 0.004(3) -0.006(3) 
C2 0.028(5) 0.027(5) 0.021(5) -0.001(4) 0.000(3) -0.003(4) 
C3 0.026(5) 0.038(6) 0.038(6) -0.001(4) 0.009(4) -0.005(4) 
C4 0.024(5) 0.030(6) 0.051(6) 0.002(5) 0.002(4) -0.006(4) 
C5 0.030(5) 0.033(6) 0.037(6) 0.001(4) 0.001(4) -0.005(4) 
C6 0.028(5) 0.032(6) 0.028(5) -0.001(4) 0.007(4) -0.002(4) 
C7 0.032(5) 0.026(5) 0.040(5) 0.004(4) 0.018(4) 0.002(4) 
C8 0.076(7) 0.034(7) 0.044(6) 0.013(5) 0.024(5) 0.006(5) 
C9 0.046(6) 0.044(6) 0.032(5) -0.004(5) 0.014(4) 0.006(5) 
C10 0.027(5) 0.027(5) 0.042(6) 0.012(4) 0.007(4) 0.006(4) 
C11 0.036(5) 0.037(6) 0.068(7) 0.011(5) 0.017(5) 0.013(4) 
C12 0.023(5) 0.057(7) 0.055(7) -0.010(5) 0.004(4) 0.007(4) 
C13 0.032(5) 0.017(4) 0.034(5) -0.001(4) 0.005(4) -0.003(3) 
C14 0.058(6) 0.025(6) 0.031(6) 0.000(4) -0.005(4) -0.007(4) 
C15 0.030(5) 0.030(6) 0.079(8) -0.008(5) 0.005(5) -0.008(4) 
C16 0.025(4) 0.036(6) 0.023(5) -0.005(4) 0.002(3) -0.001(3) 
C17 0.036(5) 0.038(6) 0.030(5) -0.006(4) 0.003(4) -0.012(4) 
C18 0.048(5) 0.038(6) 0.029(5) -0.010(4) 0.010(4) -0.001(5) 
C19 0.025(4) 0.023(5) 0.047(6) -0.003(4) 0.018(4) 0.000(3) 
C20 0.024(5) 0.027(5) 0.051(6) 0.002(4) 0.010(4) -0.002(4) 
C21 0.038(5) 0.043(7) 0.045(6) 0.007(5) 0.020(5) -0.003(4) 
C22 0.027(4) 0.027(5) 0.023(5) 0.001(4) 0.007(3) 0.003(3) 
C23 0.030(5) 0.037(6) 0.034(5) -0.007(4) 0.014(4) 0.001(4) 
C24 0.027(5) 0.030(5) 0.041(6) -0.002(4) 0.009(4) 0.003(4) 
 
_geom_special_details 
; 
 All esds (except the esd in the dihedral angle between two l.s. planes) 
 are estimated using the full covariance matrix.  The cell esds are taken 
 into account individually in the estimation of esds in distances, angles 
 and torsion angles; correlations between esds in cell parameters are only 
 used when they are defined by crystal symmetry.  An approximate (isotropic) 
 treatment of cell esds is used for estimating esds involving l.s. planes. 
; 
 
loop_ 
 _geom_bond_atom_site_label_1 
 _geom_bond_atom_site_label_2 
 _geom_bond_distance 
 _geom_bond_site_symmetry_2 
 _geom_bond_publ_flag 
Os C25A 1.853(6) . ? 
Os C25B 1.897(9) . ? 
Os B 1.991(11) . ? 
Os P2 2.376(2) . ? 
Os P1 2.394(2) . ? 
Os Cl1A 2.421(2) . ? 
Os Cl1B 2.467(10) . ? 
P1 C7 1.840(8) . ? 
P1 C13 1.847(8) . ? 
P1 C10 1.860(8) . ? 
P2 C16 1.852(8) . ? 
P2 C22 1.853(8) . ? 
P2 C19 1.855(8) . ? 
O3A C25A 1.114(7) . ? 
O3B C25B 1.105(9) . ? 
O1 C1 1.390(9) . ? 
O1 B 1.436(11) . ? 
O2 C2 1.378(9) . ? 
O2 B 1.431(10) . ? 
C1 C6 1.366(11) . ? 
C1 C2 1.384(11) . ? 
C2 C3 1.392(11) . ? 
C3 C4 1.406(11) . ? 
C3 H3 0.9500 . ? 
C4 C5 1.374(11) . ? 
C4 H4 0.9500 . ? 
C5 C6 1.398(11) . ? 
C5 H5 0.9500 . ? 
C6 H6 0.9500 . ? 
C7 C8 1.522(11) . ? 
C7 C9 1.528(12) . ? 
C7 H7 1.0000 . ? 
C8 H8A 0.9800 . ? 
C8 H8B 0.9800 . ? 
C8 H8C 0.9800 . ? 
C9 H9A 0.9800 . ? 
C9 H9B 0.9800 . ? 
C9 H9C 0.9800 . ? 
C10 C12 1.516(12) . ? 
C10 C11 1.526(12) . ? 
C10 H10 1.0000 . ? 
C11 H11A 0.9800 . ? 
C11 H11B 0.9800 . ? 
C11 H11C 0.9800 . ? 
C12 H12A 0.9800 . ? 
C12 H12B 0.9800 . ? 
C12 H12C 0.9800 . ? 
C13 C14 1.518(11) . ? 
C13 C15 1.535(11) . ? 
C13 H13 1.0000 . ? 
C14 H14A 0.9800 . ? 
C14 H14B 0.9800 . ? 
C14 H14C 0.9800 . ? 
C15 H15A 0.9800 . ? 
C15 H15B 0.9800 . ? 
C15 H15C 0.9800 . ? 
C16 C17 1.527(11) . ? 
C16 C18 1.539(11) . ? 
C16 H16 1.0000 . ? 
C17 H17A 0.9800 . ? 
C17 H17B 0.9800 . ? 
C17 H17C 0.9800 . ? 
C18 H18A 0.9800 . ? 
C18 H18B 0.9800 . ? 
C18 H18C 0.9800 . ? 
C19 C20 1.530(11) . ? 
C19 C21 1.546(11) . ? 
C19 H19 1.0000 . ? 
C20 H20A 0.9800 . ? 
C20 H20B 0.9800 . ? 
C20 H20C 0.9800 . ? 
C21 H21A 0.9800 . ? 
C21 H21B 0.9800 . ? 
C21 H21C 0.9800 . ? 
C22 C23 1.519(11) . ? 
C22 C24 1.525(11) . ? 
C22 H22 1.0000 . ? 
C23 H23A 0.9800 . ? 
C23 H23B 0.9800 . ? 
C23 H23C 0.9800 . ? 
C24 H24A 0.9800 . ? 
C24 H24B 0.9800 . ? 
C24 H24C 0.9800 . ? 
 
loop_ 
 _geom_angle_atom_site_label_1 
 _geom_angle_atom_site_label_2 
 _geom_angle_atom_site_label_3 
 _geom_angle 
 _geom_angle_site_symmetry_1 
 _geom_angle_site_symmetry_3 
 _geom_angle_publ_flag 
C25A Os C25B 175.2(15) . . ? 
C25A Os B 86.9(4) . . ? 
C25B Os B 89.1(15) . . ? 
C25A Os P2 89.2(3) . . ? 
C25B Os P2 93.6(16) . . ? 
B Os P2 93.1(3) . . ? 
C25A Os P1 89.5(3) . . ? 
C25B Os P1 88.7(16) . . ? 
B Os P1 100.6(3) . . ? 
P2 Os P1 166.10(7) . . ? 
C25A Os Cl1A 169.6(3) . . ? 
C25B Os Cl1A 14.7(15) . . ? 
B Os Cl1A 103.6(3) . . ? 
P2 Os Cl1A 90.14(8) . . ? 
P1 Os Cl1A 88.60(8) . . ? 
C25A Os Cl1B 2.9(6) . . ? 
C25B Os Cl1B 177.8(16) . . ? 
B Os Cl1B 89.7(5) . . ? 
P2 Os Cl1B 88.4(4) . . ? 
P1 Os Cl1B 89.7(4) . . ? 
Cl1A Os Cl1B 166.7(4) . . ? 
C7 P1 C13 103.4(4) . . ? 
C7 P1 C10 110.8(4) . . ? 
C13 P1 C10 103.6(4) . . ? 
C7 P1 Os 116.6(3) . . ? 
C13 P1 Os 107.2(3) . . ? 
C10 P1 Os 113.8(3) . . ? 
C16 P2 C22 102.5(4) . . ? 
C16 P2 C19 103.3(4) . . ? 
C22 P2 C19 109.3(4) . . ? 
C16 P2 Os 107.8(3) . . ? 
C22 P2 Os 116.7(3) . . ? 
C19 P2 Os 115.5(3) . . ? 
O3A C25A Os 178.9(10) . . ? 
O3B C25B Os 169(4) . . ? 
C1 O1 B 107.3(6) . . ? 
C2 O2 B 106.6(7) . . ? 
O2 B O1 107.0(8) . . ? 
O2 B Os 128.9(7) . . ? 
O1 B Os 124.1(6) . . ? 
C6 C1 C2 123.3(7) . . ? 
C6 C1 O1 128.4(7) . . ? 
C2 C1 O1 108.2(7) . . ? 
O2 C2 C1 110.7(7) . . ? 
O2 C2 C3 127.9(8) . . ? 
C1 C2 C3 121.4(8) . . ? 
C2 C3 C4 115.0(8) . . ? 
C2 C3 H3 122.5 . . ? 
C4 C3 H3 122.5 . . ? 
C5 C4 C3 123.0(8) . . ? 
C5 C4 H4 118.5 . . ? 
C3 C4 H4 118.5 . . ? 
C4 C5 C6 121.0(8) . . ? 
C4 C5 H5 119.5 . . ? 
C6 C5 H5 119.5 . . ? 
C1 C6 C5 116.2(8) . . ? 
C1 C6 H6 121.9 . . ? 
C5 C6 H6 121.9 . . ? 
C8 C7 C9 110.5(8) . . ? 
C8 C7 P1 115.9(6) . . ? 
C9 C7 P1 113.5(6) . . ? 
C8 C7 H7 105.3 . . ? 
C9 C7 H7 105.3 . . ? 
P1 C7 H7 105.3 . . ? 
C7 C8 H8A 109.5 . . ? 
C7 C8 H8B 109.5 . . ? 
H8A C8 H8B 109.5 . . ? 
C7 C8 H8C 109.5 . . ? 
H8A C8 H8C 109.5 . . ? 
H8B C8 H8C 109.5 . . ? 
C7 C9 H9A 109.5 . . ? 
C7 C9 H9B 109.5 . . ? 
H9A C9 H9B 109.5 . . ? 
C7 C9 H9C 109.5 . . ? 
H9A C9 H9C 109.5 . . ? 
H9B C9 H9C 109.5 . . ? 
C12 C10 C11 110.6(7) . . ? 
C12 C10 P1 113.0(6) . . ? 
C11 C10 P1 116.9(6) . . ? 
C12 C10 H10 105.1 . . ? 
C11 C10 H10 105.1 . . ? 
P1 C10 H10 105.1 . . ? 
C10 C11 H11A 109.5 . . ? 
C10 C11 H11B 109.5 . . ? 
H11A C11 H11B 109.5 . . ? 
C10 C11 H11C 109.5 . . ? 
H11A C11 H11C 109.5 . . ? 
H11B C11 H11C 109.5 . . ? 
C10 C12 H12A 109.5 . . ? 
C10 C12 H12B 109.5 . . ? 
H12A C12 H12B 109.5 . . ? 
C10 C12 H12C 109.5 . . ? 
H12A C12 H12C 109.5 . . ? 
H12B C12 H12C 109.5 . . ? 
C14 C13 C15 111.3(7) . . ? 
C14 C13 P1 111.0(6) . . ? 
C15 C13 P1 112.5(6) . . ? 
C14 C13 H13 107.3 . . ? 
C15 C13 H13 107.3 . . ? 
P1 C13 H13 107.3 . . ? 
C13 C14 H14A 109.5 . . ? 
C13 C14 H14B 109.5 . . ? 
H14A C14 H14B 109.5 . . ? 
C13 C14 H14C 109.5 . . ? 
H14A C14 H14C 109.5 . . ? 
H14B C14 H14C 109.5 . . ? 
C13 C15 H15A 109.5 . . ? 
C13 C15 H15B 109.5 . . ? 
H15A C15 H15B 109.5 . . ? 
C13 C15 H15C 109.5 . . ? 
H15A C15 H15C 109.5 . . ? 
H15B C15 H15C 109.5 . . ? 
C17 C16 C18 109.7(7) . . ? 
C17 C16 P2 111.8(6) . . ? 
C18 C16 P2 112.7(6) . . ? 
C17 C16 H16 107.5 . . ? 
C18 C16 H16 107.5 . . ? 
P2 C16 H16 107.5 . . ? 
C16 C17 H17A 109.5 . . ? 
C16 C17 H17B 109.5 . . ? 
H17A C17 H17B 109.5 . . ? 
C16 C17 H17C 109.5 . . ? 
H17A C17 H17C 109.5 . . ? 
H17B C17 H17C 109.5 . . ? 
C16 C18 H18A 109.5 . . ? 
C16 C18 H18B 109.5 . . ? 
H18A C18 H18B 109.5 . . ? 
C16 C18 H18C 109.5 . . ? 
H18A C18 H18C 109.5 . . ? 
H18B C18 H18C 109.5 . . ? 
C20 C19 C21 108.9(7) . . ? 
C20 C19 P2 112.5(6) . . ? 
C21 C19 P2 116.9(6) . . ? 
C20 C19 H19 105.9 . . ? 
C21 C19 H19 105.9 . . ? 
P2 C19 H19 105.9 . . ? 
C19 C20 H20A 109.5 . . ? 
C19 C20 H20B 109.5 . . ? 
H20A C20 H20B 109.5 . . ? 
C19 C20 H20C 109.5 . . ? 
H20A C20 H20C 109.5 . . ? 
H20B C20 H20C 109.5 . . ? 
C19 C21 H21A 109.5 . . ? 
C19 C21 H21B 109.5 . . ? 
H21A C21 H21B 109.5 . . ? 
C19 C21 H21C 109.5 . . ? 
H21A C21 H21C 109.5 . . ? 
H21B C21 H21C 109.5 . . ? 
C23 C22 C24 111.1(7) . . ? 
C23 C22 P2 114.2(5) . . ? 
C24 C22 P2 114.4(5) . . ? 
C23 C22 H22 105.4 . . ? 
C24 C22 H22 105.4 . . ? 
P2 C22 H22 105.4 . . ? 
C22 C23 H23A 109.5 . . ? 
C22 C23 H23B 109.5 . . ? 
H23A C23 H23B 109.5 . . ? 
C22 C23 H23C 109.5 . . ? 
H23A C23 H23C 109.5 . . ? 
H23B C23 H23C 109.5 . . ? 
C22 C24 H24A 109.5 . . ? 
C22 C24 H24B 109.5 . . ? 
H24A C24 H24B 109.5 . . ? 
C22 C24 H24C 109.5 . . ? 
H24A C24 H24C 109.5 . . ? 
H24B C24 H24C 109.5 . . ? 
 
_diffrn_measured_fraction_theta_max    0.924 
_diffrn_reflns_theta_full              27.50 
_diffrn_measured_fraction_theta_full   0.991 
_refine_diff_density_max    1.646 
_refine_diff_density_min   -2.634 
_refine_diff_density_rms    0.235 


#===END
